# Supplementary figures and images for: Recurrent evolution of high virulence in isolated populations of a DNA virus
Source: eLife journal article supplement (doi:10.7554/elife.58931), 2020-10-28

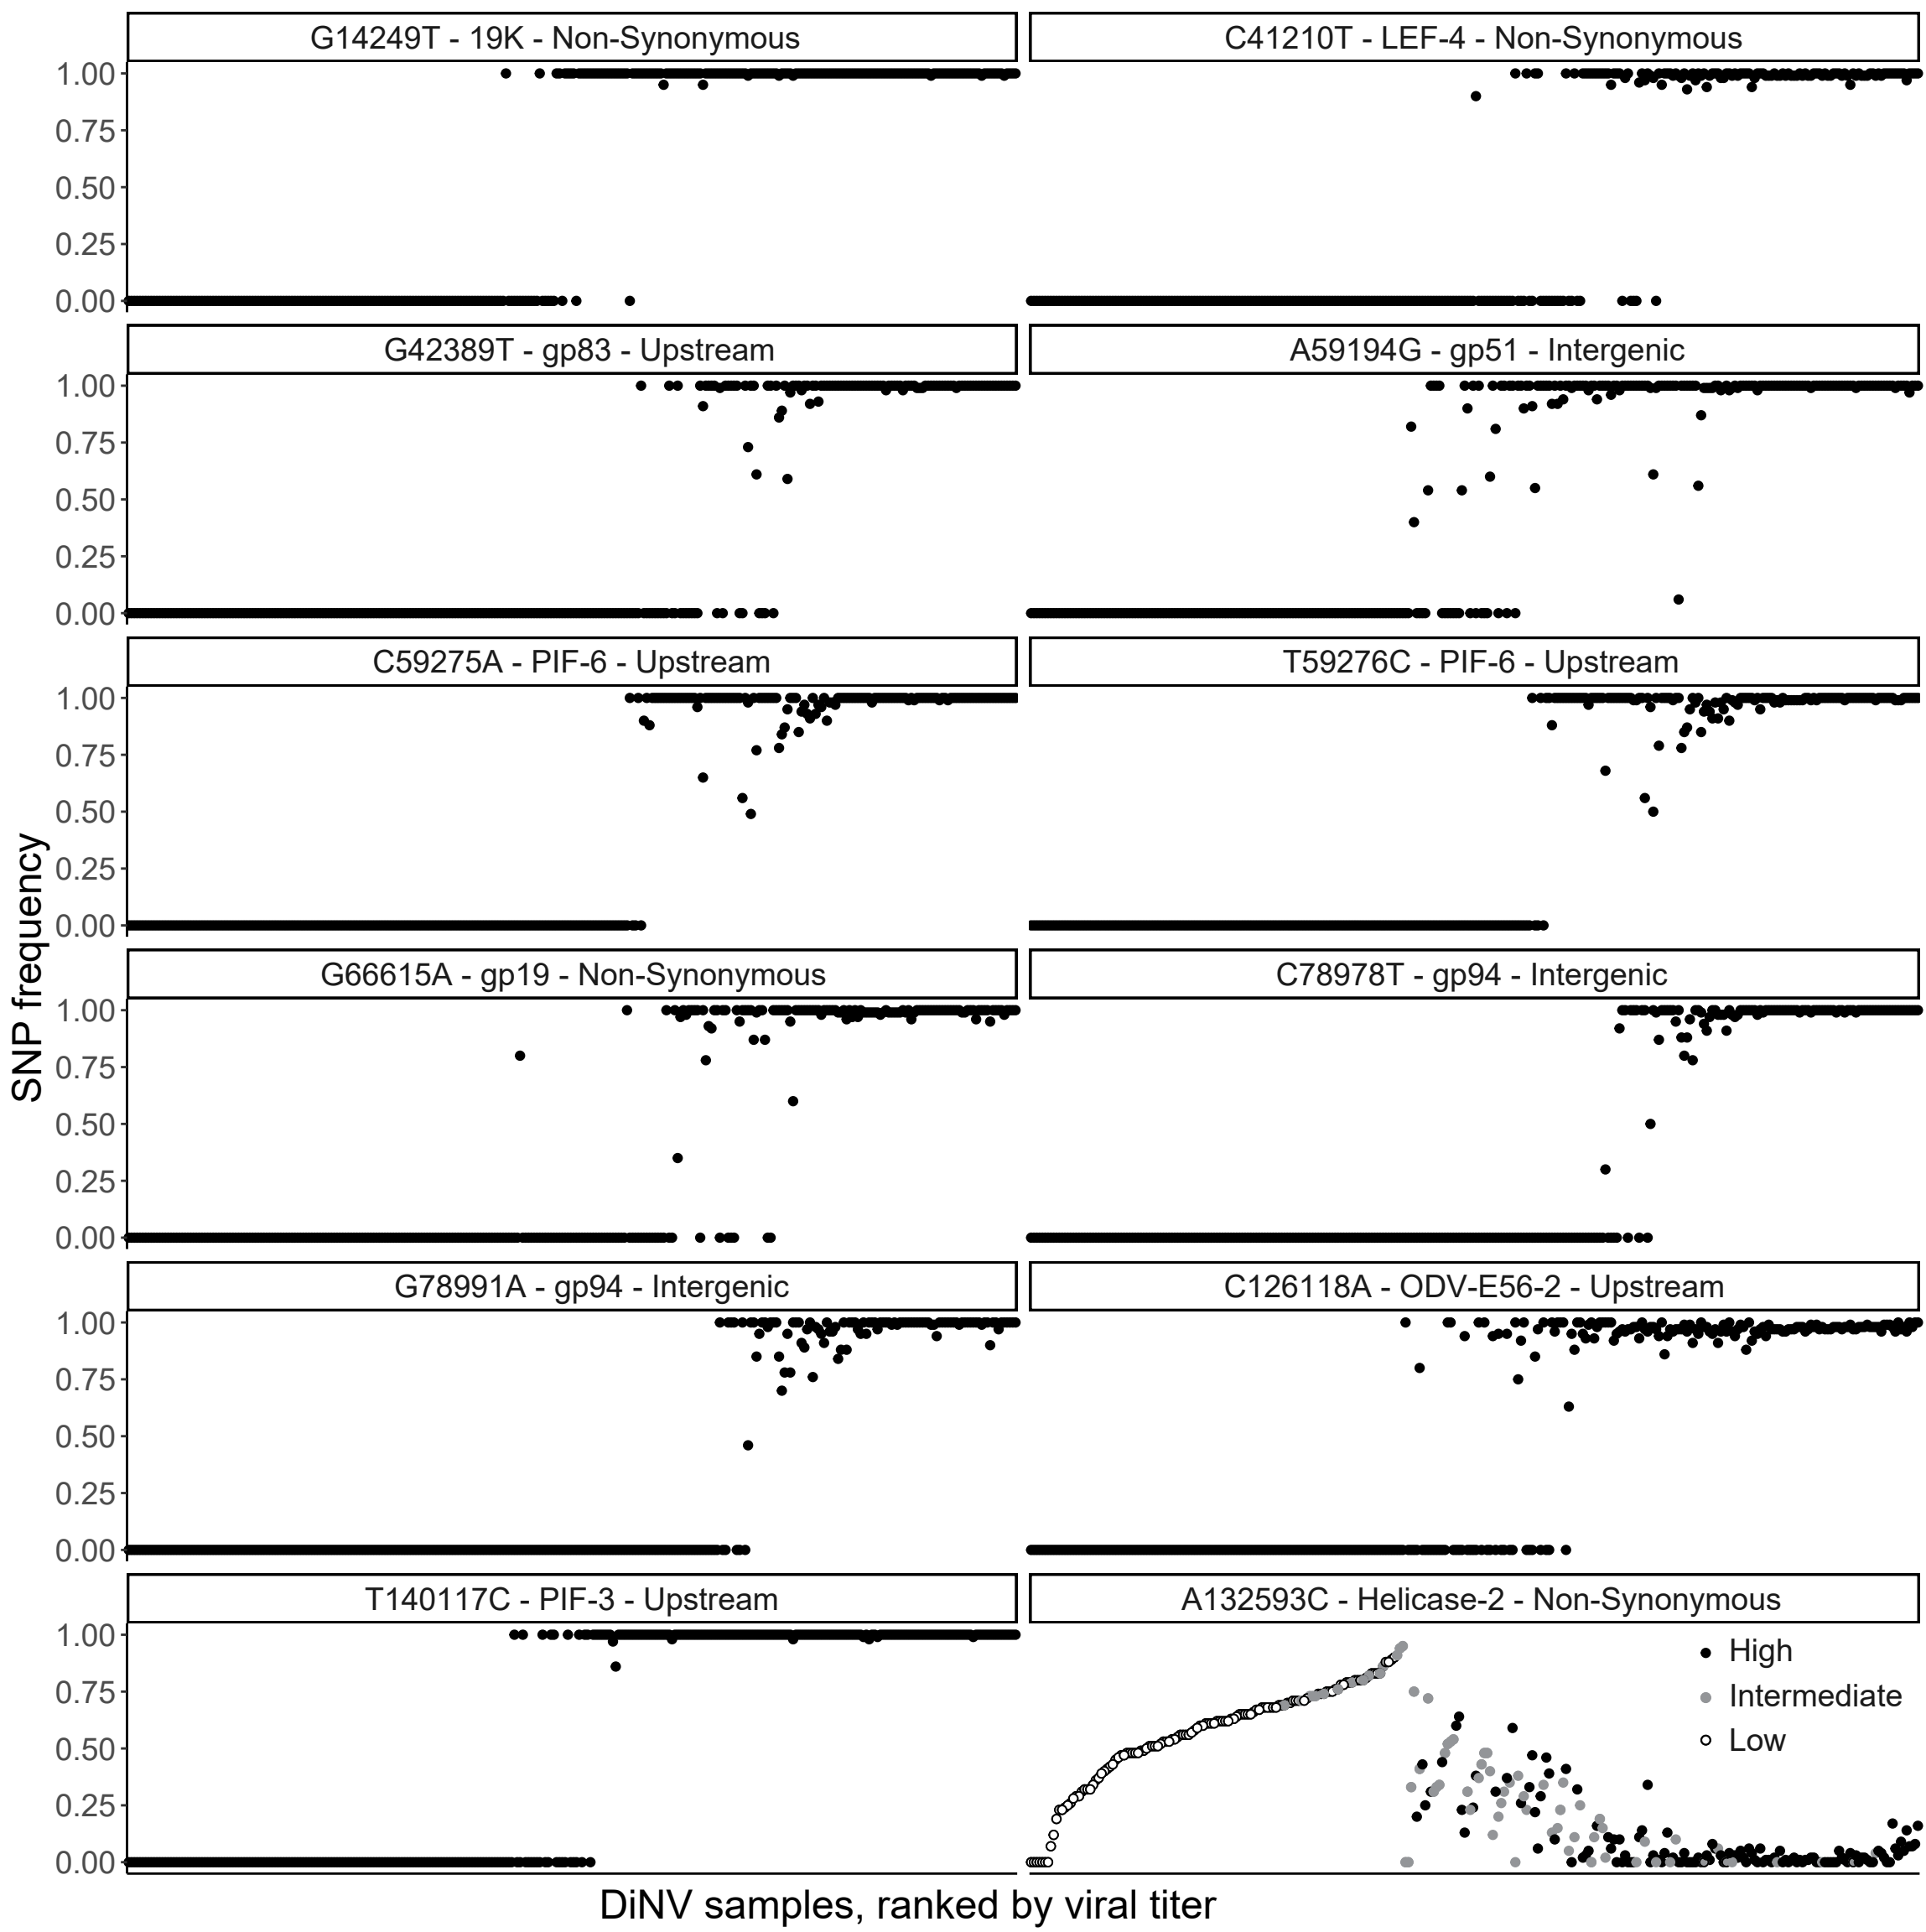

Supplement: supp [file elife_poa_e58931_Figure_1_figure_supplement_1.pdf › elife_poa_e58931_Figure_1_figure_supplement_1.pdf]

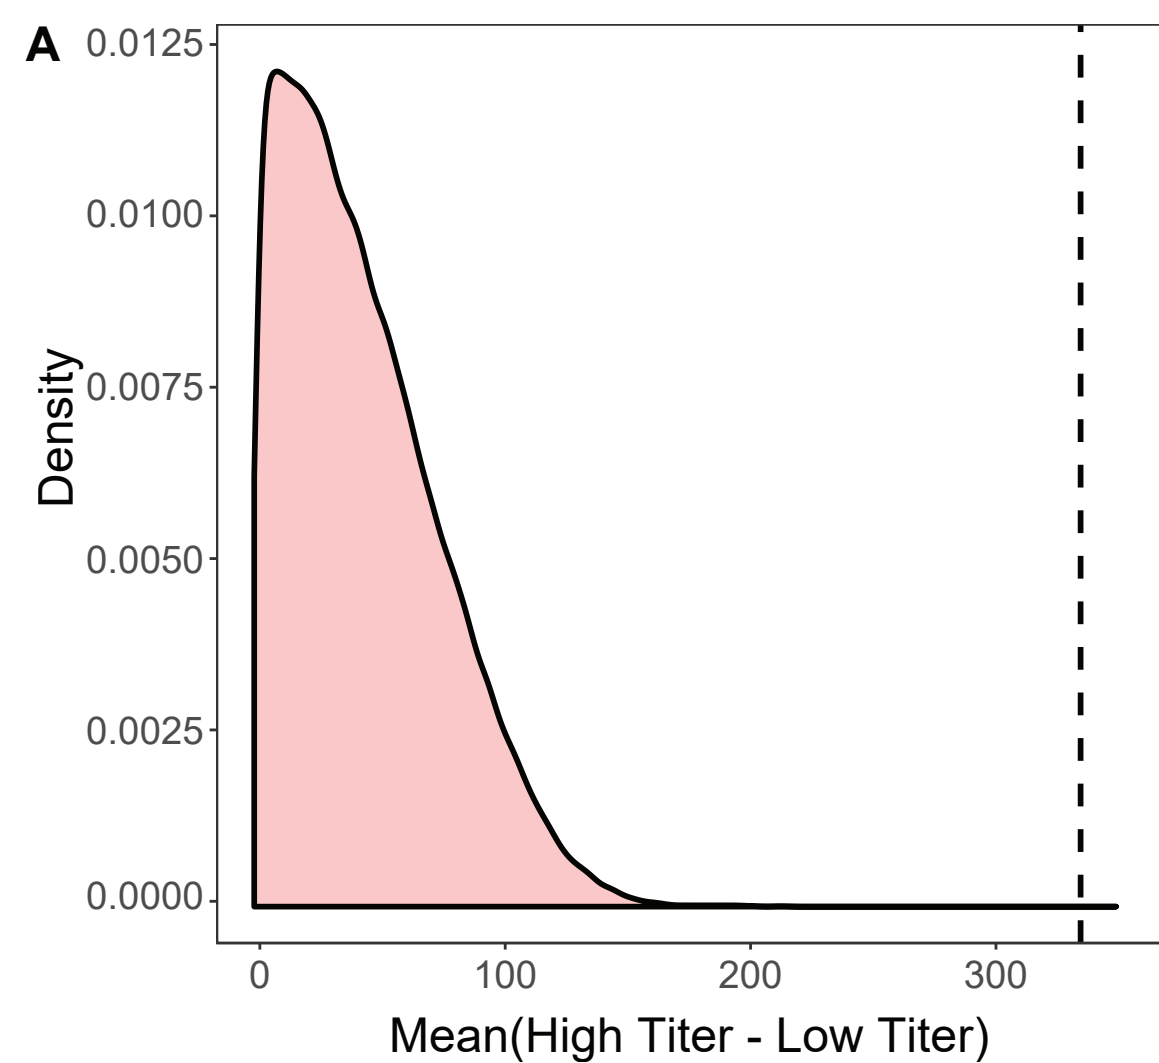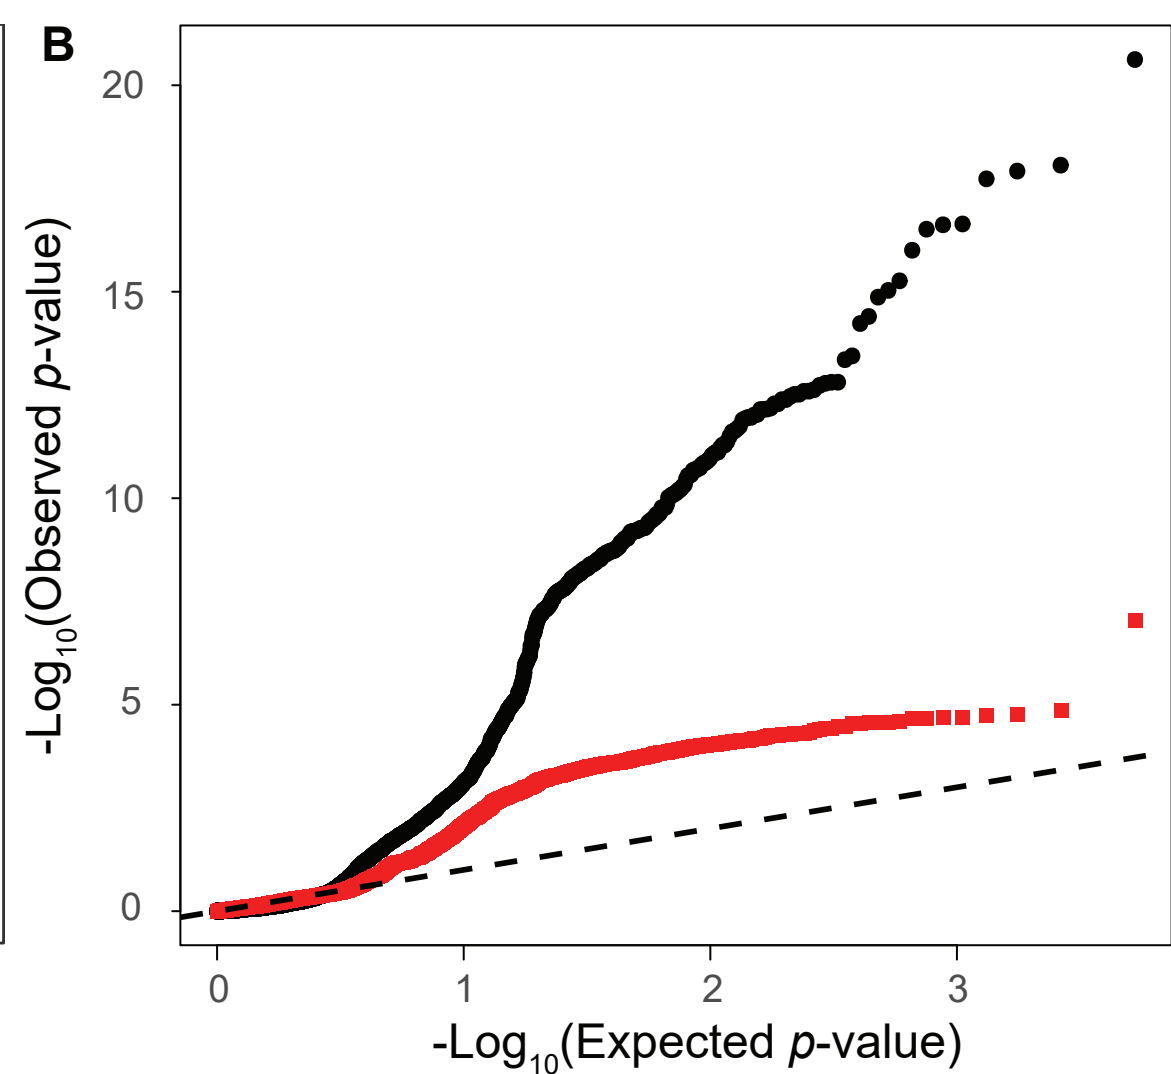

Supplement: supp [file elife_poa_e58931_Figure_1_figure_supplement_2.pdf › elife_poa_e58931_Figure_1_figure_supplement_2.pdf]

# Pairwise LD

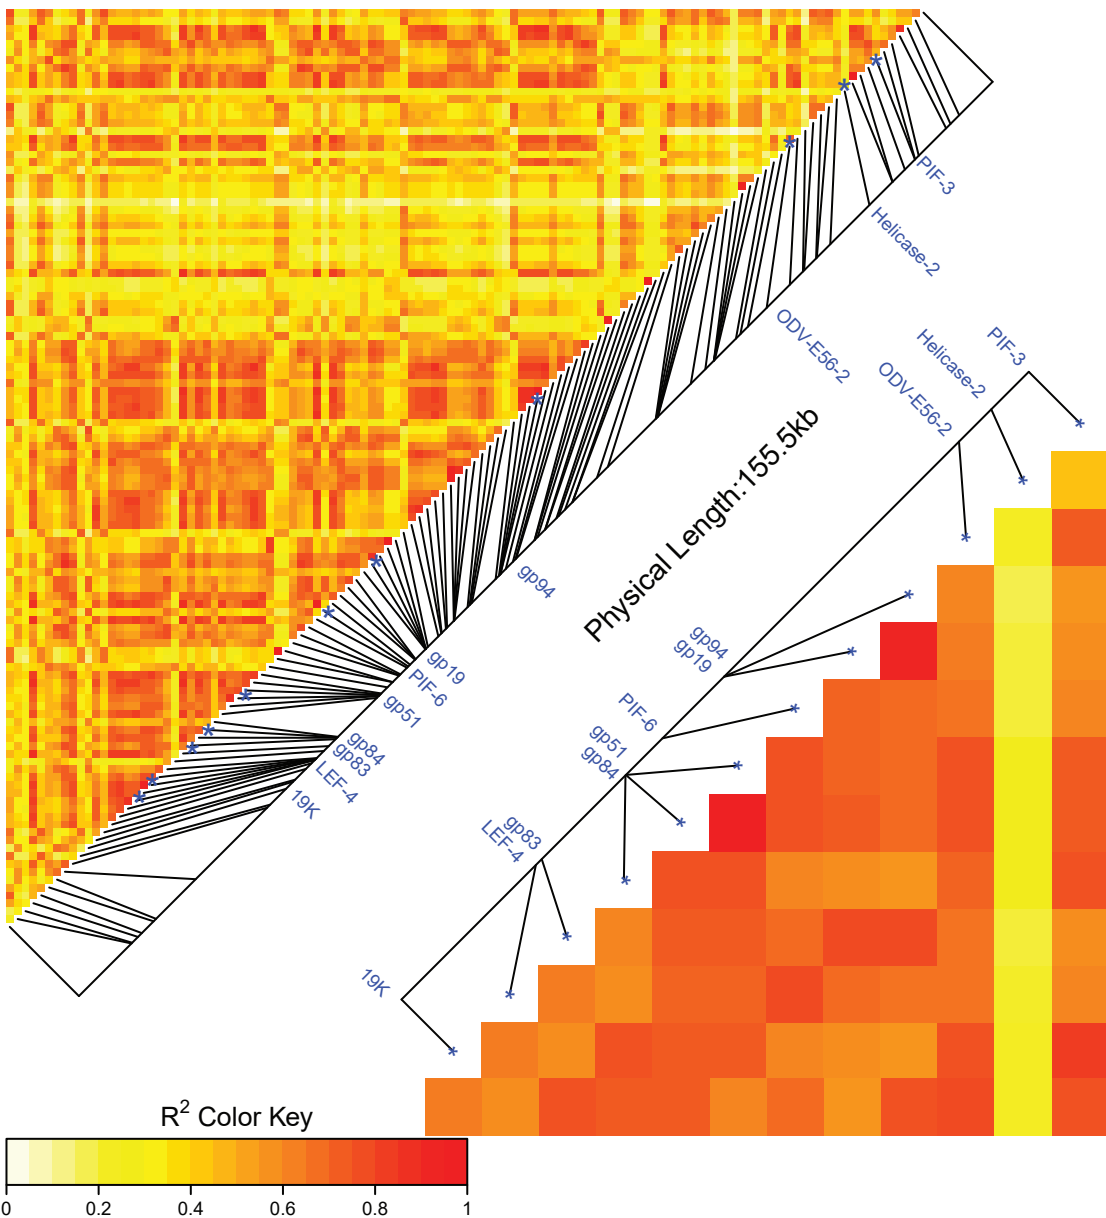

Supplement: supp [file elife_poa_e58931_Figure_1_figure_supplement_3.pdf › elife_poa_e58931_Figure_1_figure_supplement_3.pdf]

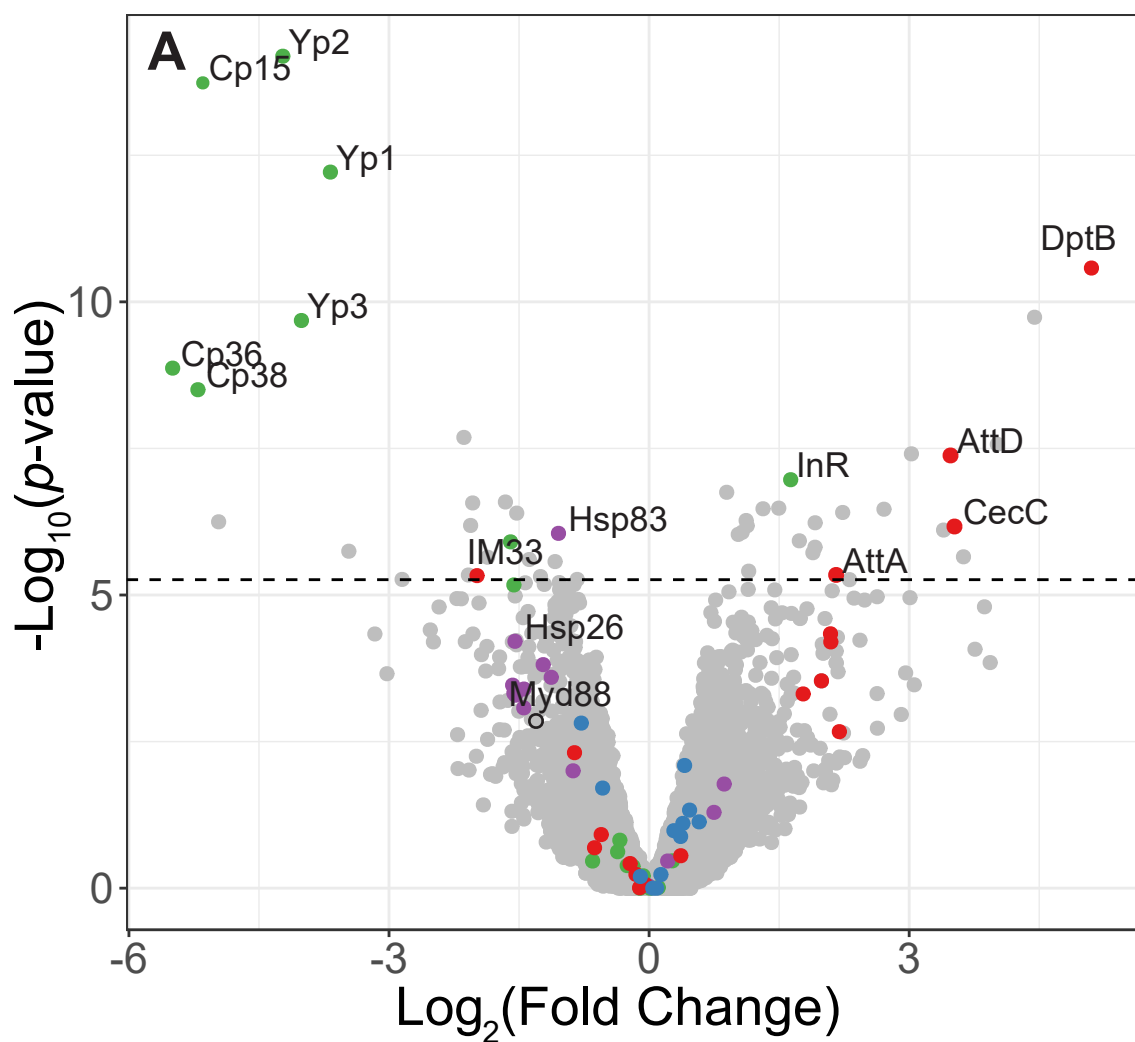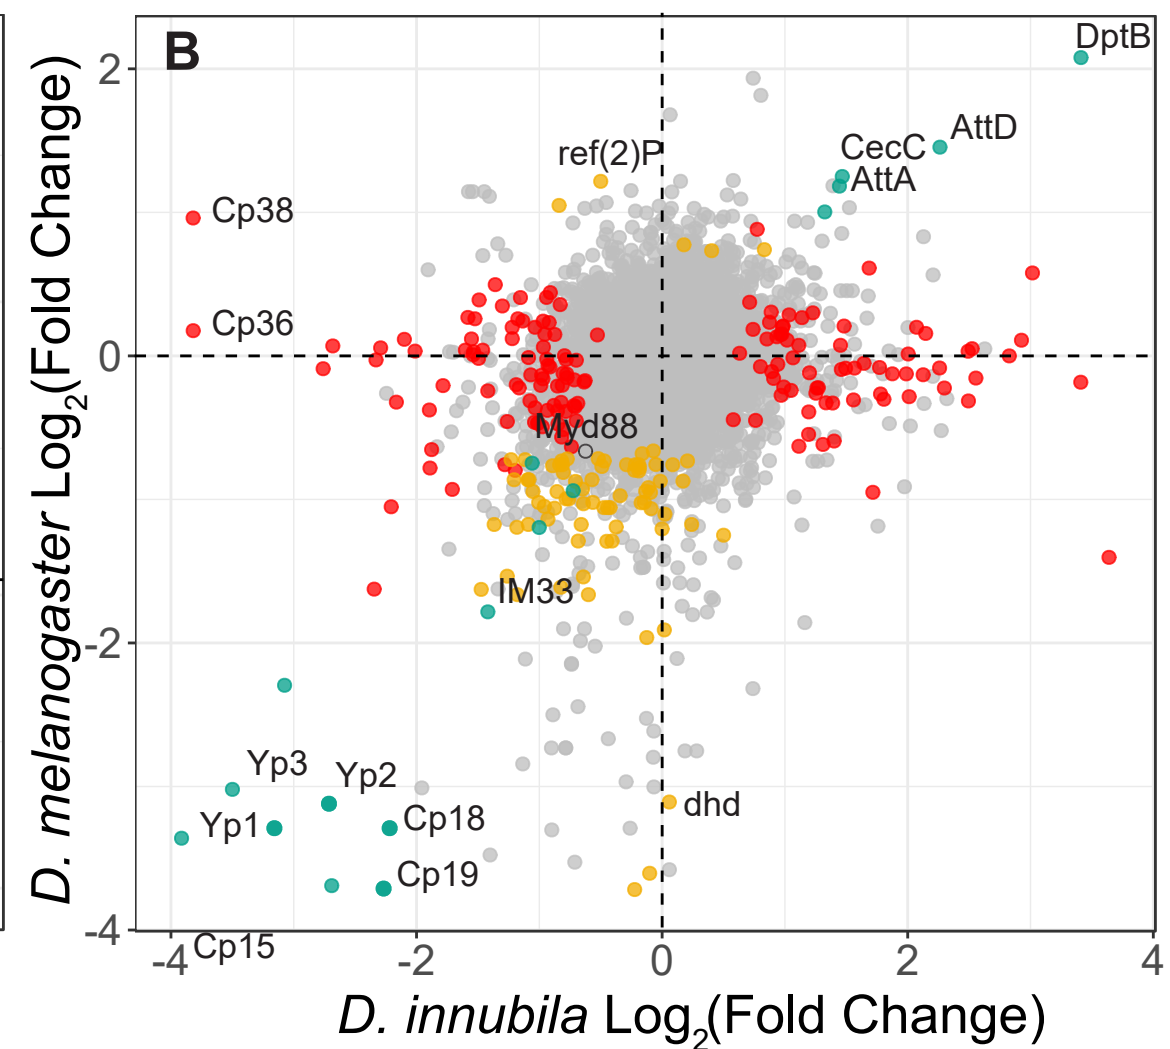

● AMP ● Antiviral RNAi ● Chorion ● HSP ● Background

Significance ● None ● *D. innubila* ● *D. melanogaster* ● Both

Supplement: supp [file elife_poa_e58931_Figure_2_figure_supplement_1.pdf › elife_poa_e58931_Figure_2_figure_supplement_1.pdf]

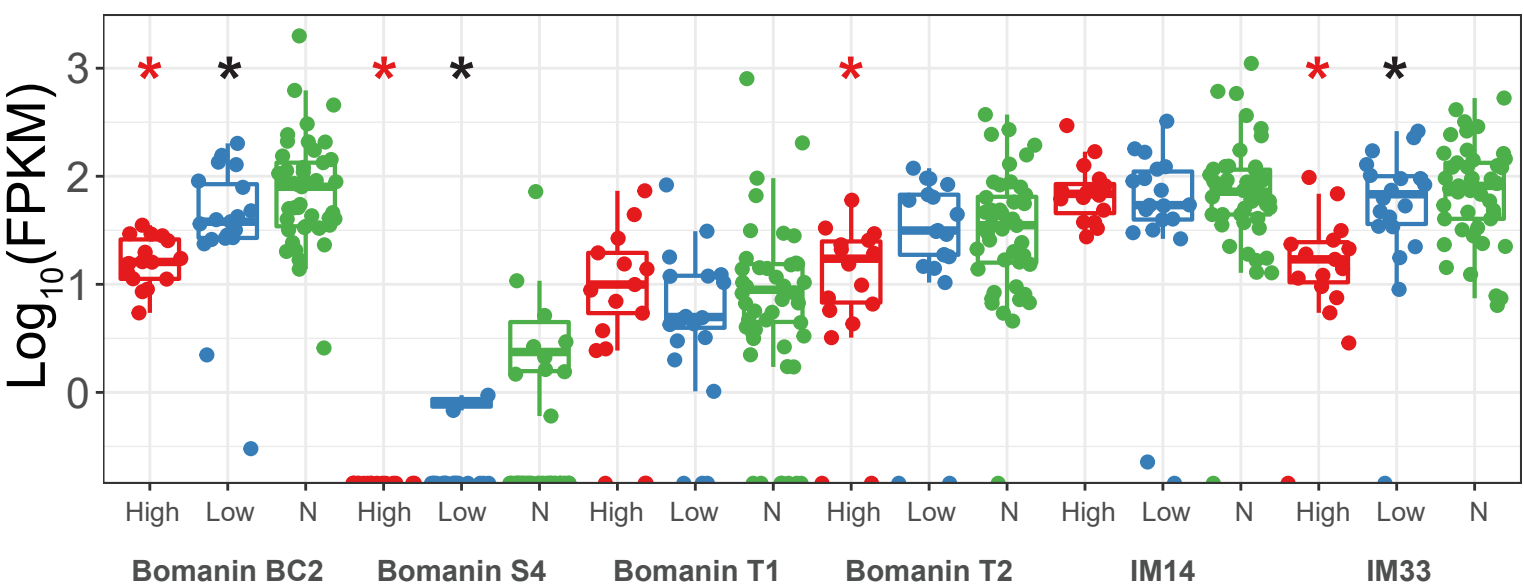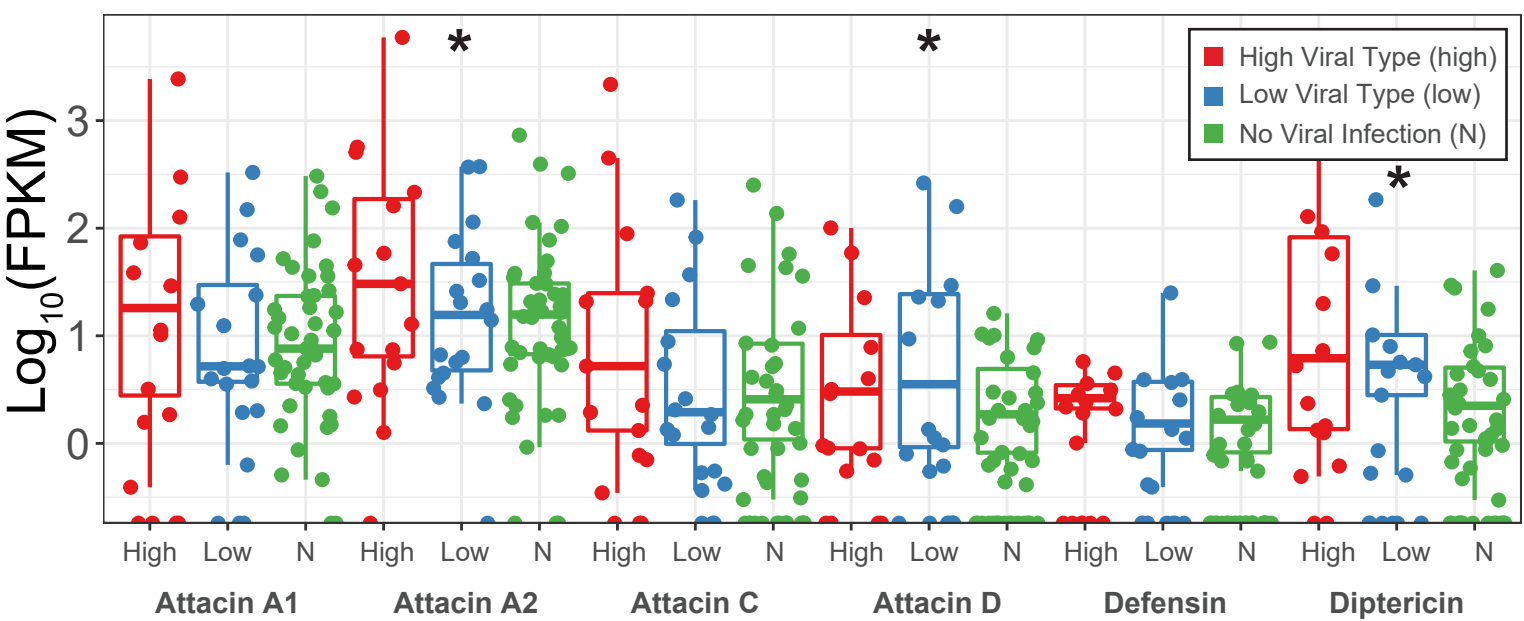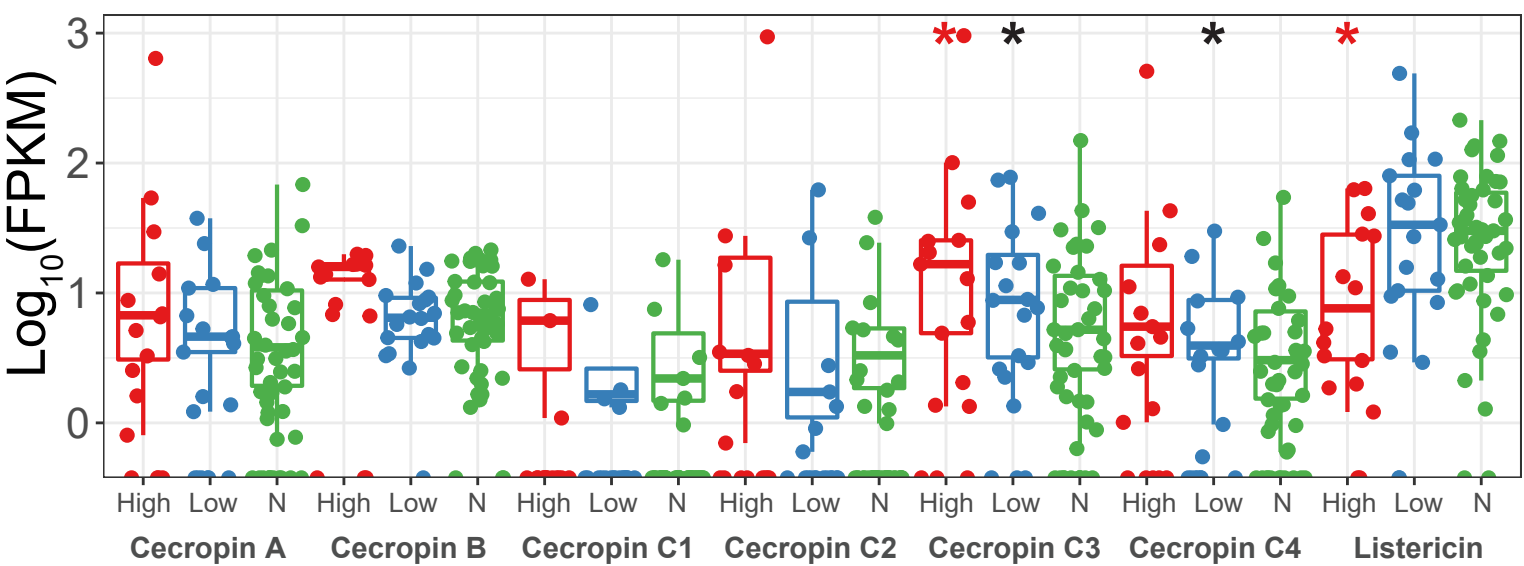

Supplement: supp [file elife_poa_e58931_Figure_2_figure_supplement_2.pdf › elife_poa_e58931_Figure_2_figure_supplement_2.pdf]

A

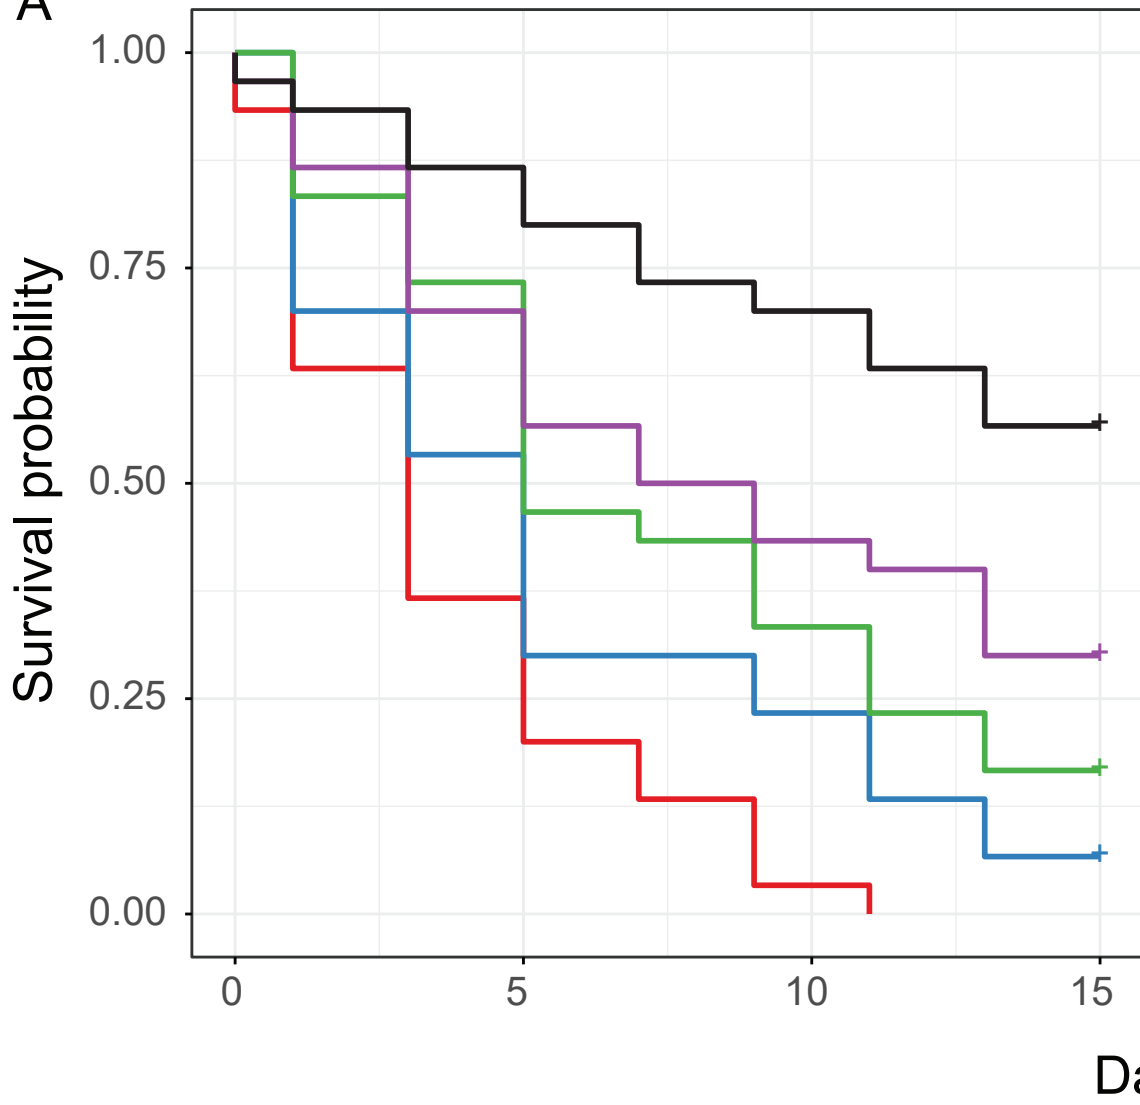

B

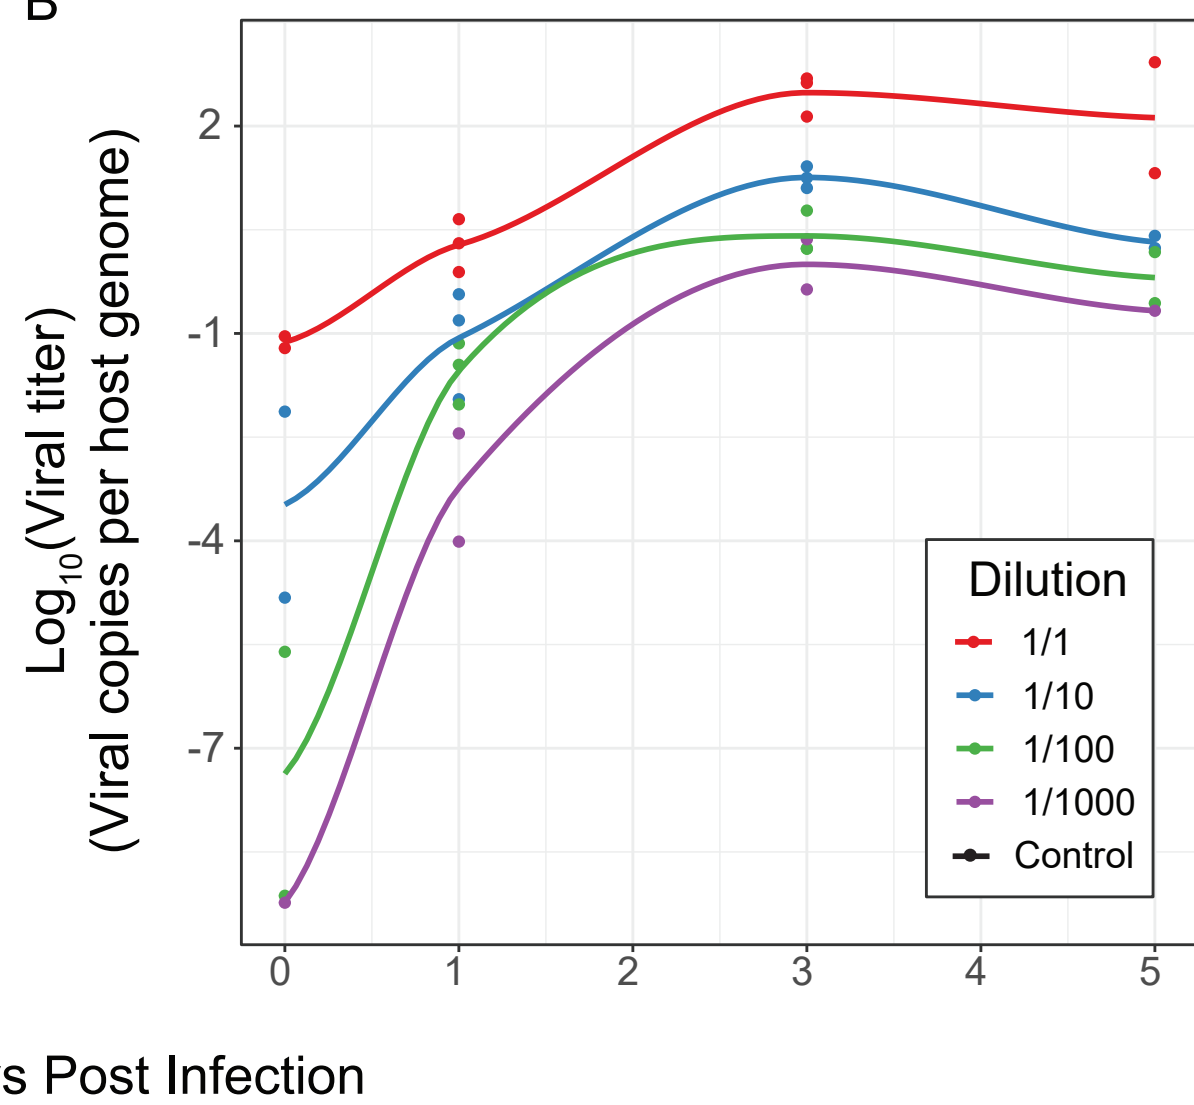

Supplement: supp [file elife_poa_e58931_Figure_3_figure_supplement_1.pdf › elife_poa_e58931_Figure_3_figure_supplement_1.pdf]

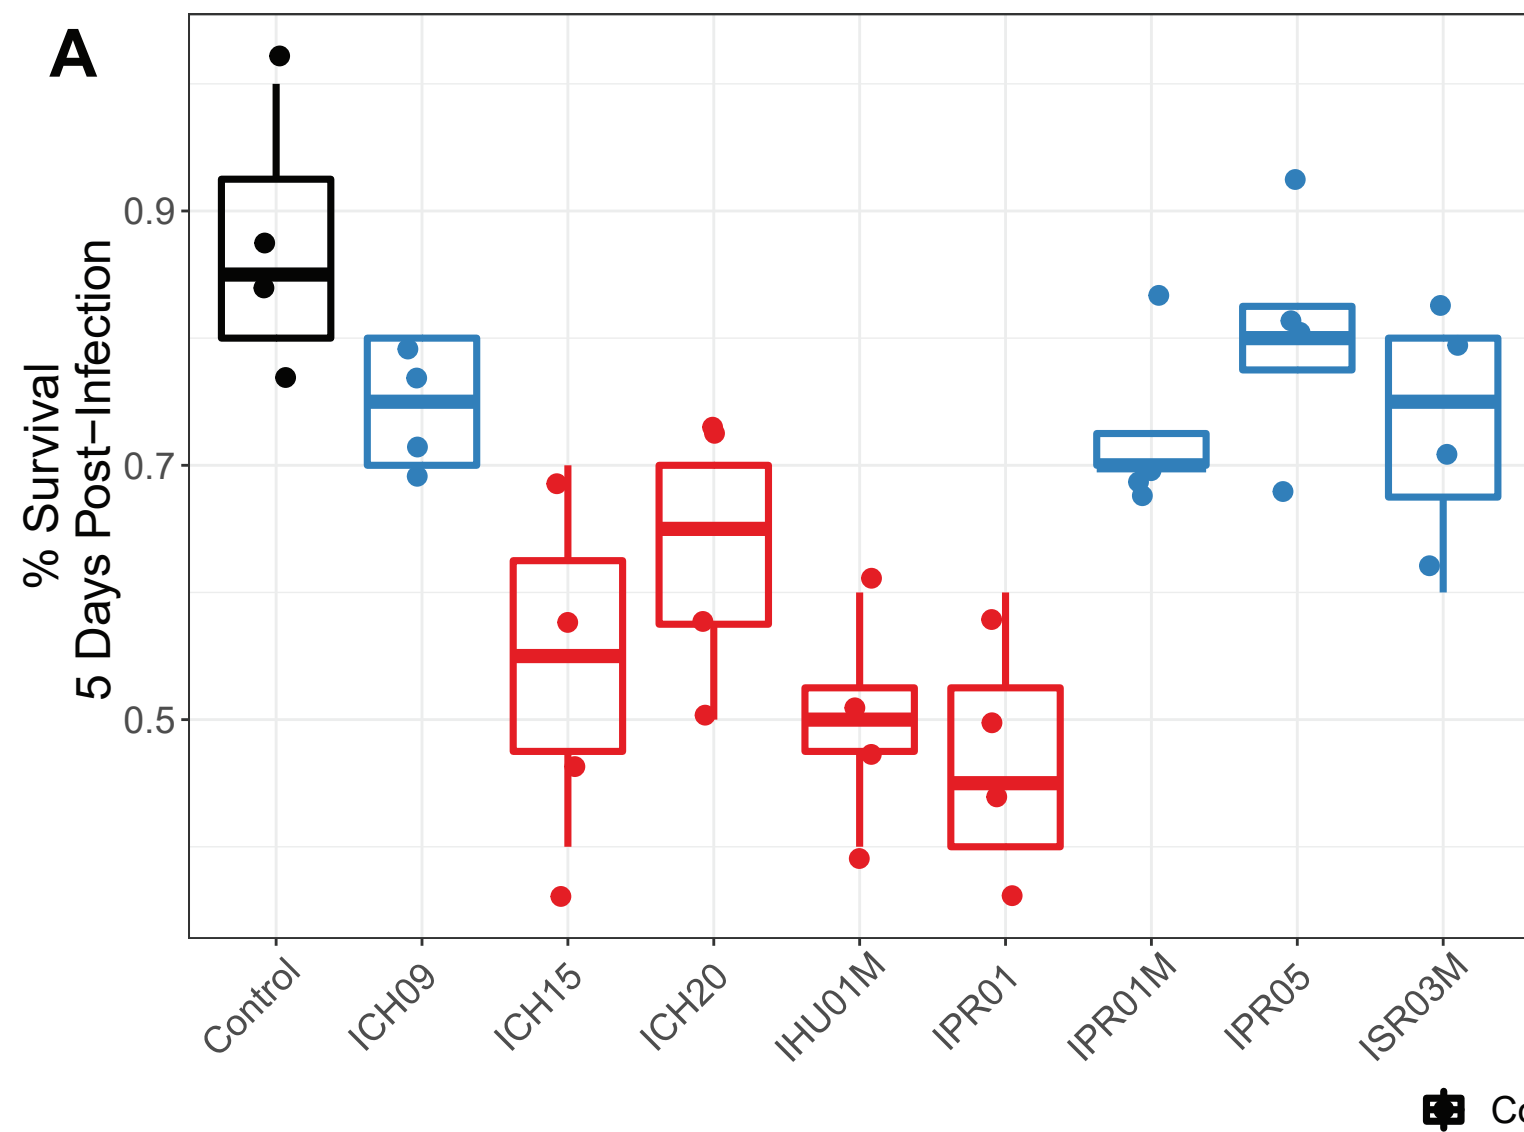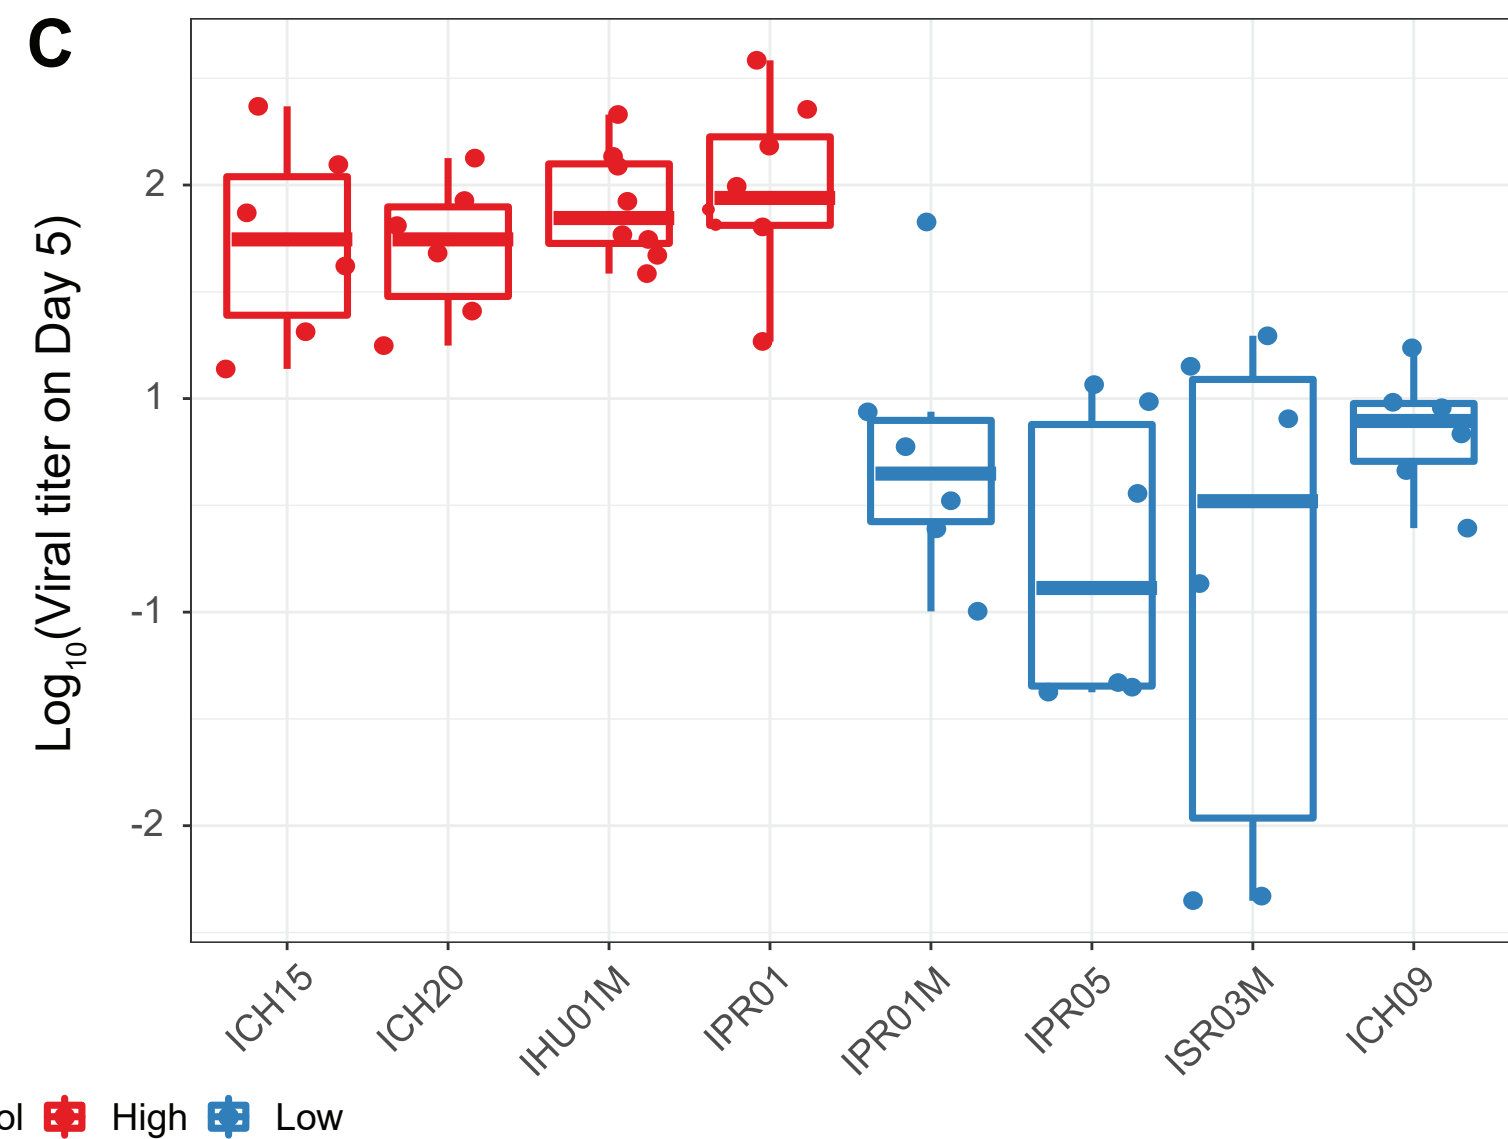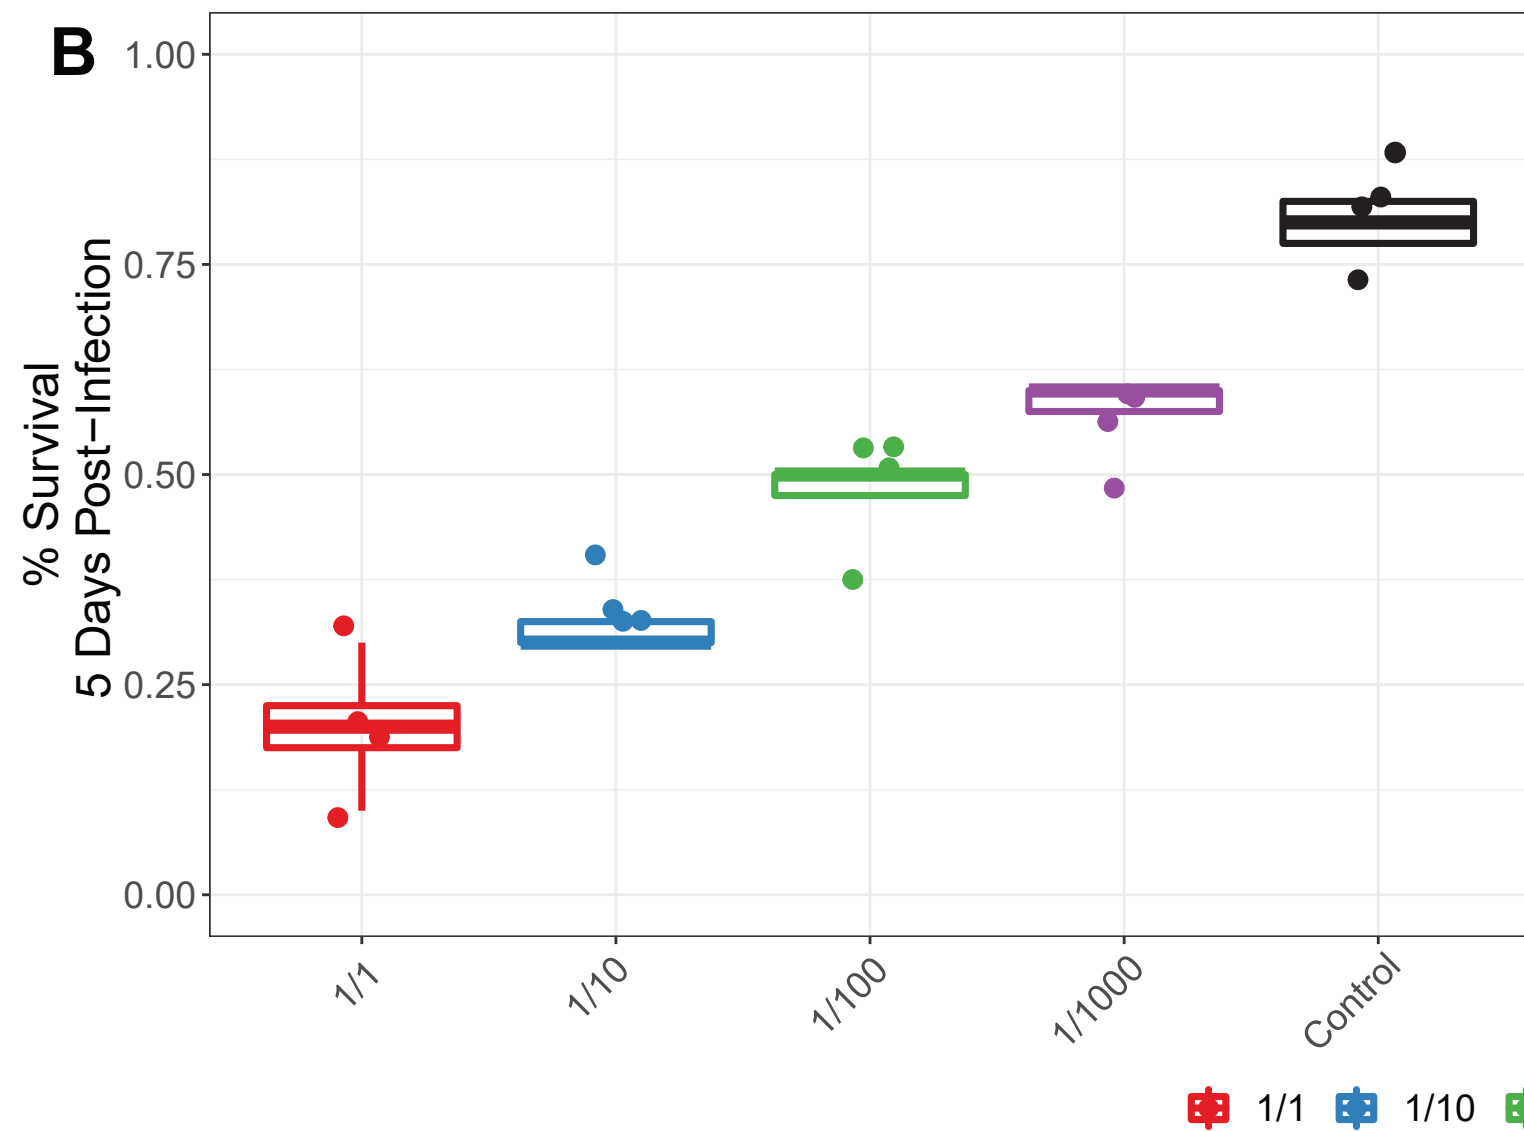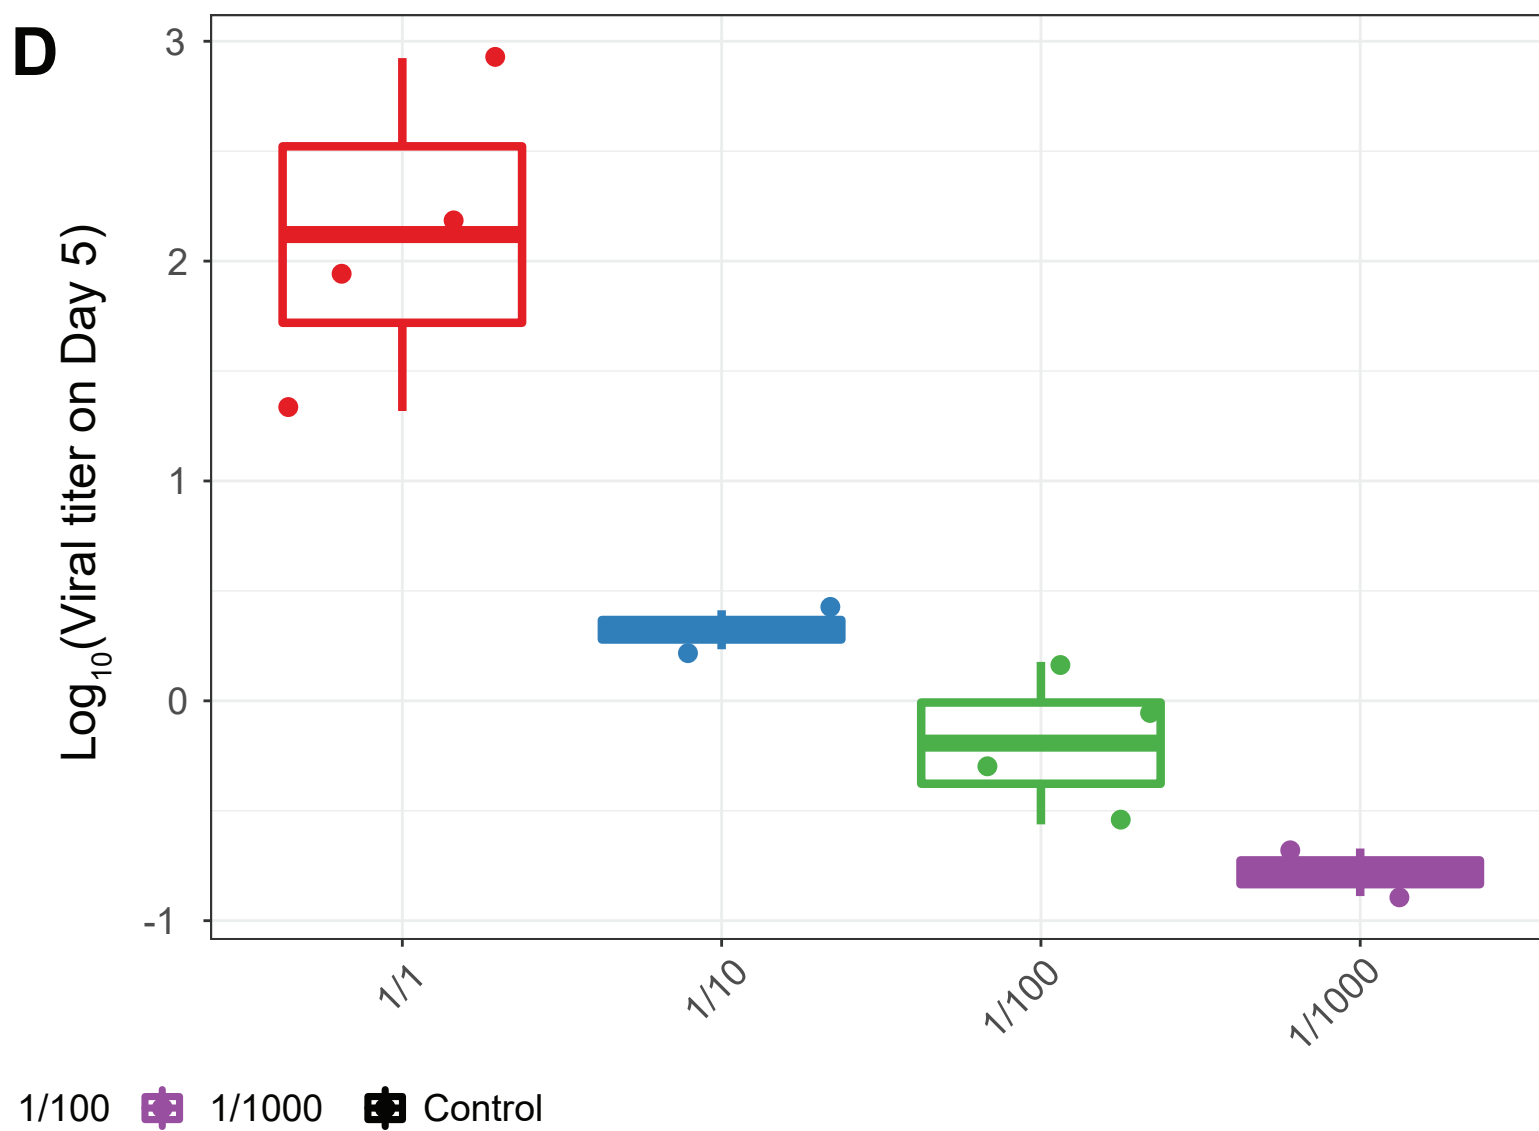

Supplement: supp [file elife_poa_e58931_Figure_3_figure_supplement_2.pdf › elife_poa_e58931_Figure_3_figure_supplement_2.pdf]

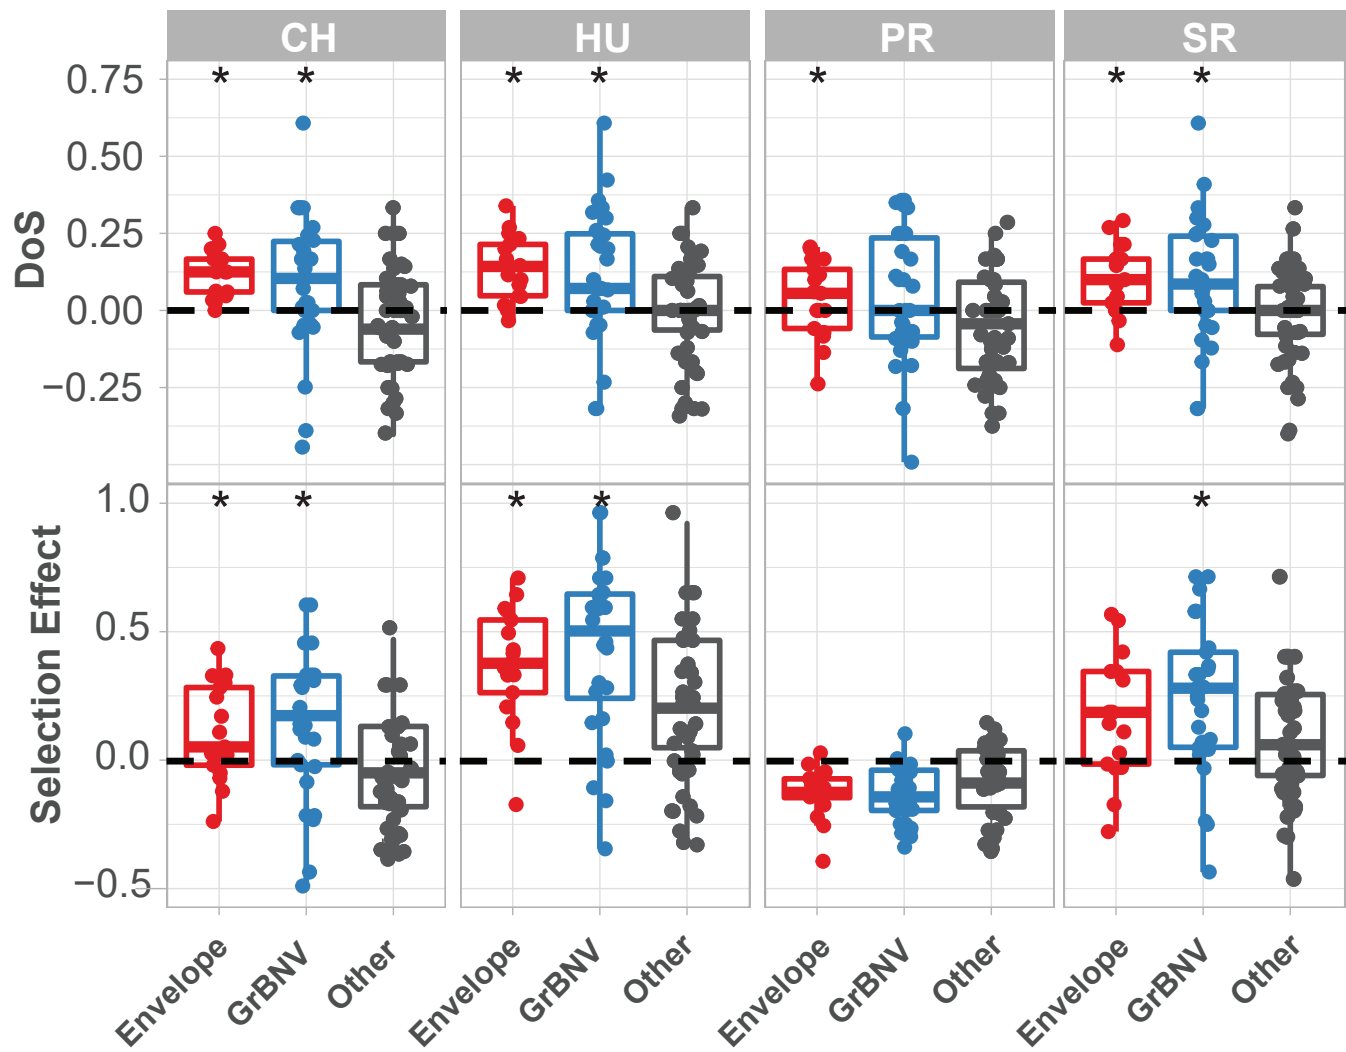

Supplement: supp [file elife_poa_e58931_Figure_4_figure_supplement_1.pdf › elife_poa_e58931_Figure_4_figure_supplement_1.pdf]

## A - Virus

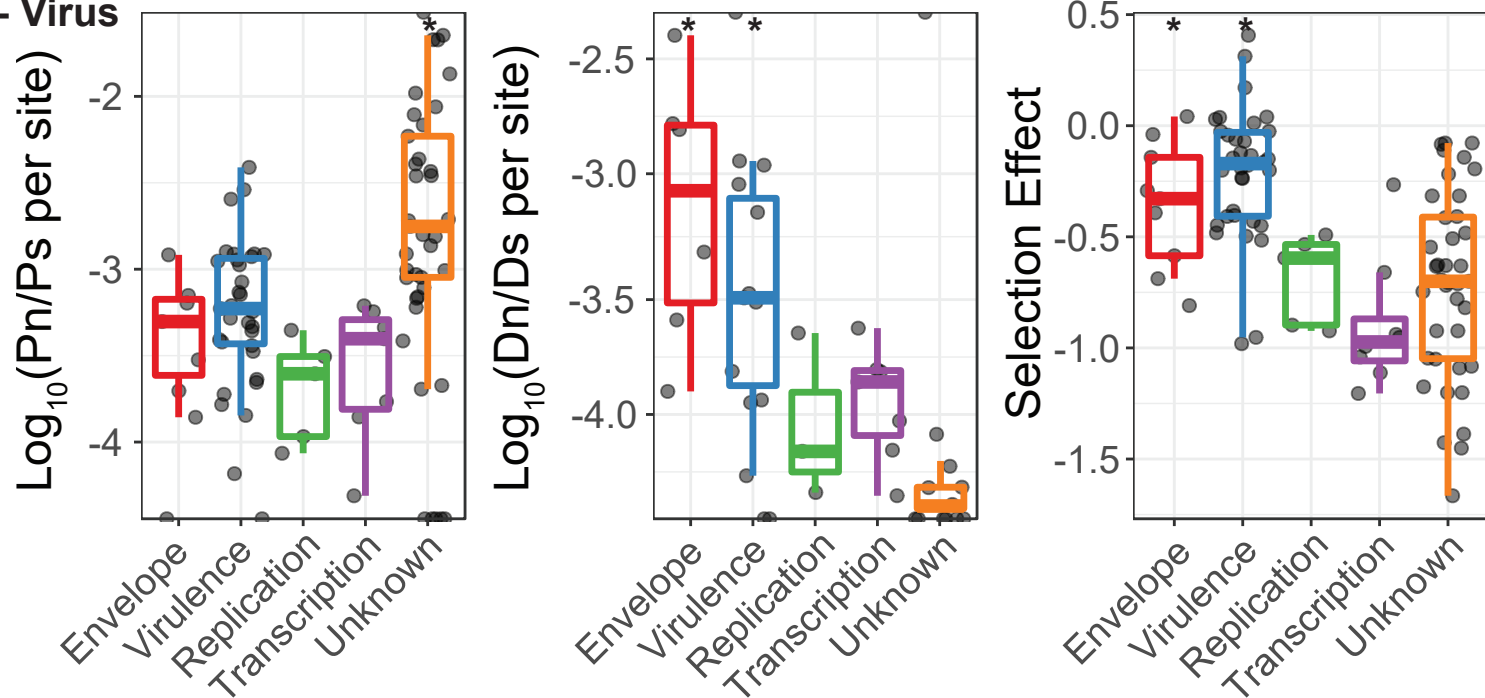

## B - Host

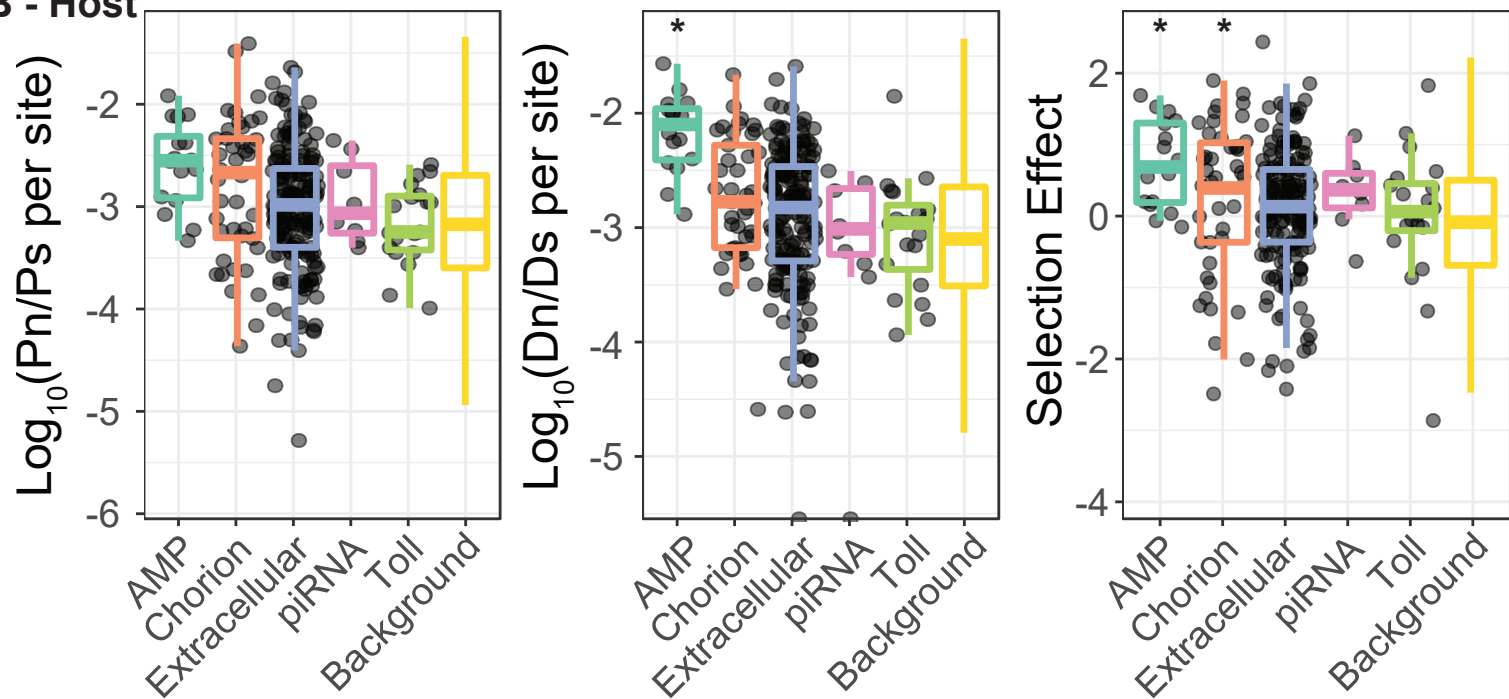

Supplement: supp [file elife_poa_e58931_Figure_4_figure_supplement_2.pdf › elife_poa_e58931_Figure_4_figure_supplement_2.pdf]

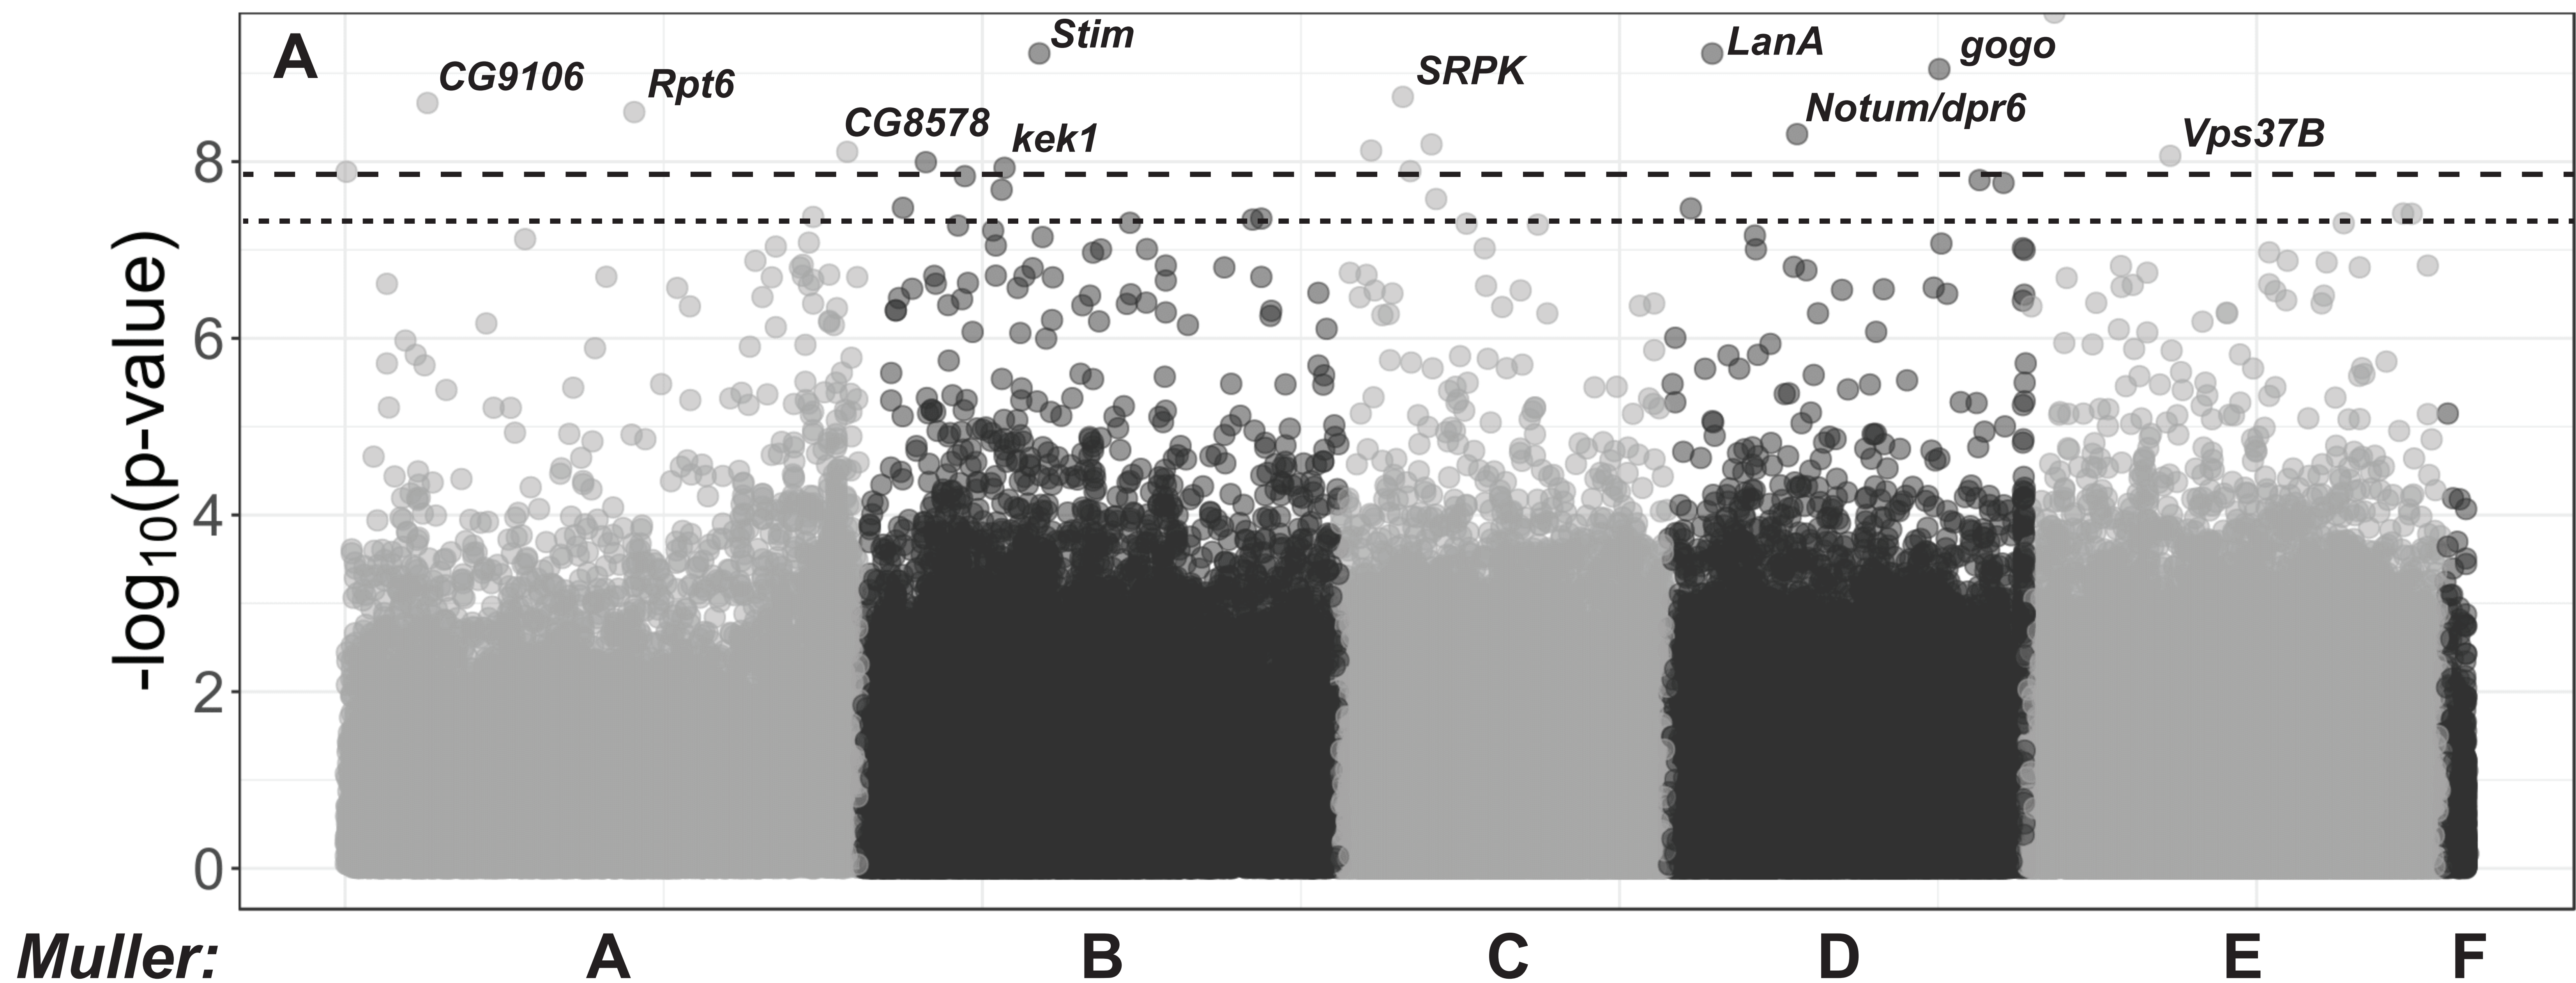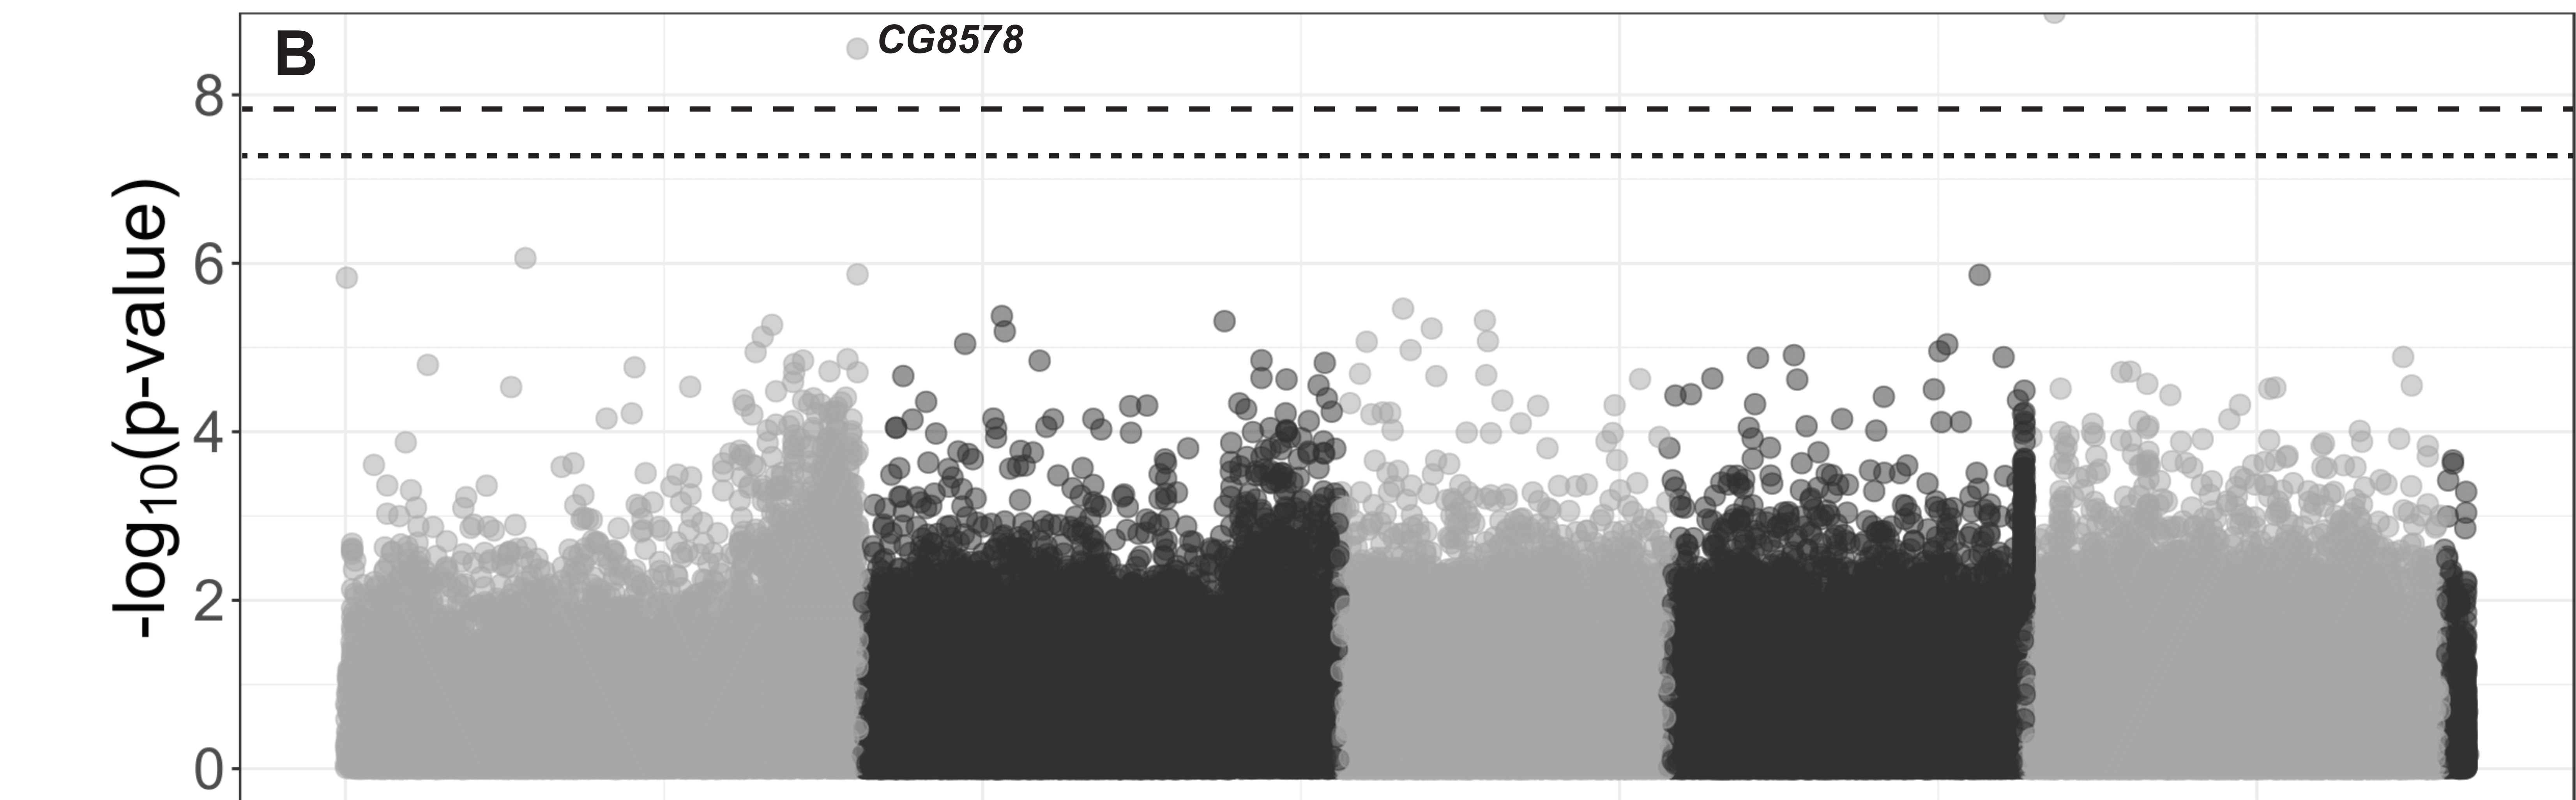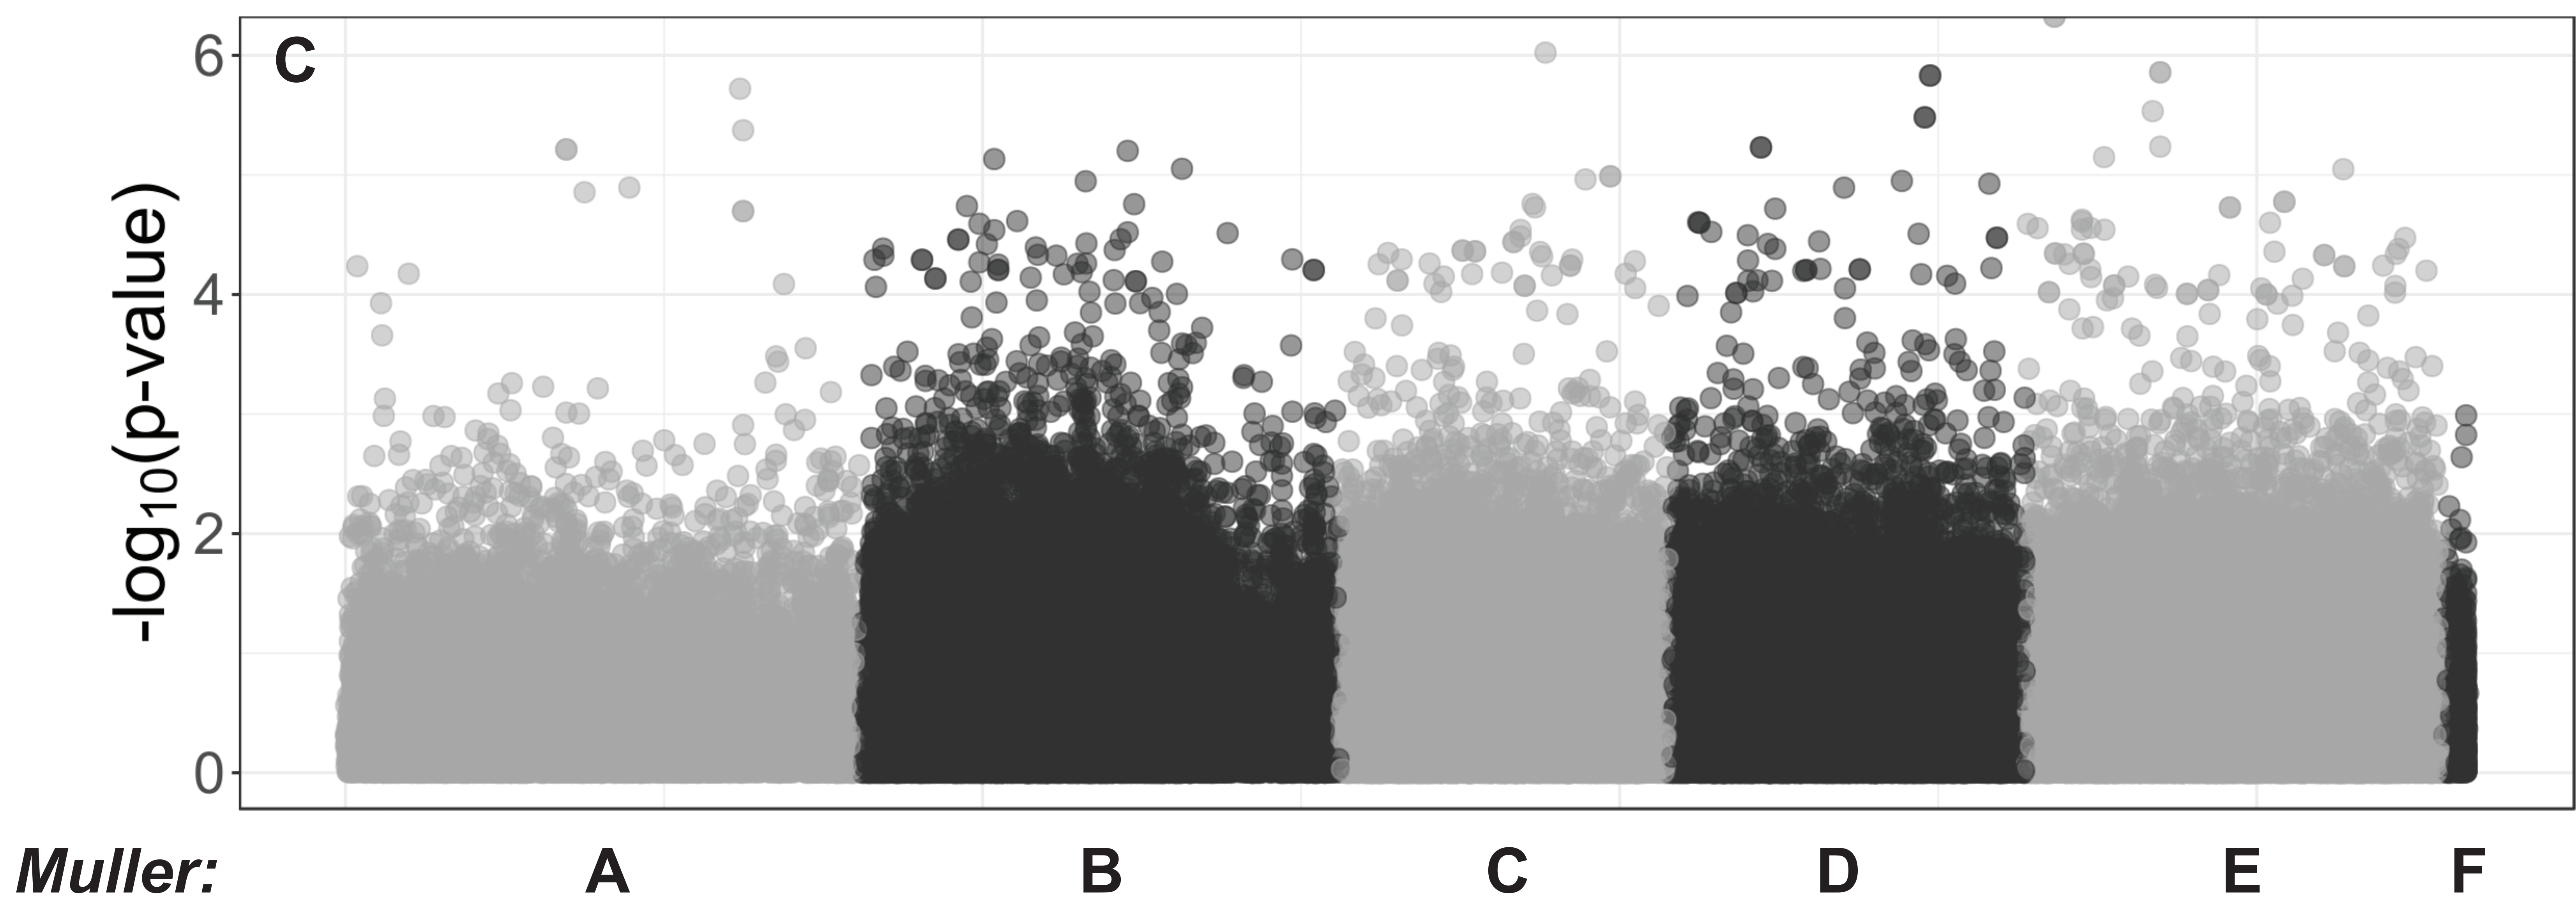

Supplement: supp [file elife_poa_e58931_Figure_4_figure_supplement_3.pdf › elife_poa_e58931_Figure_4_figure_supplement_3.pdf]

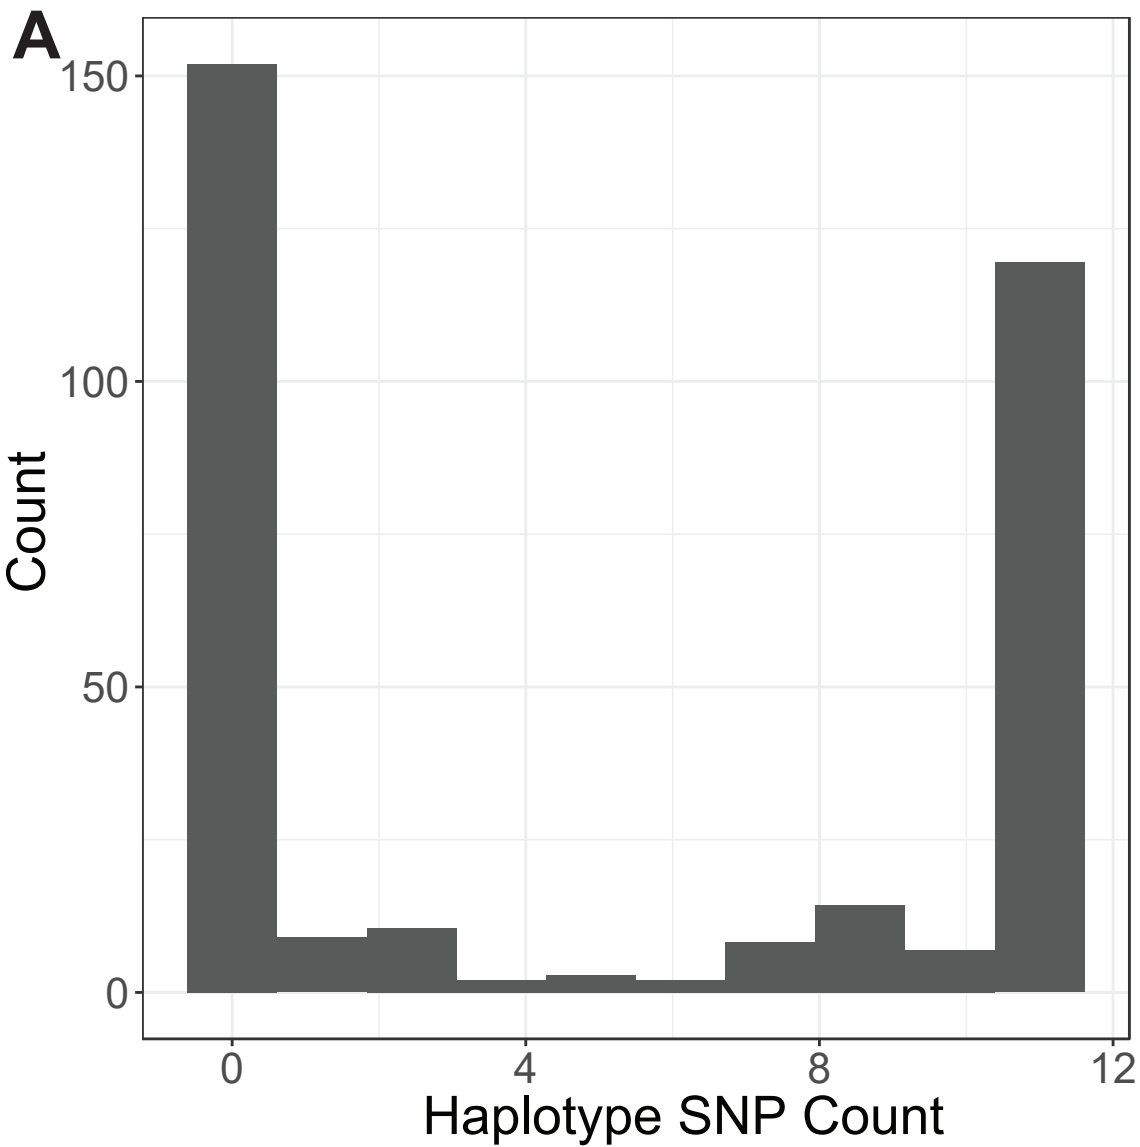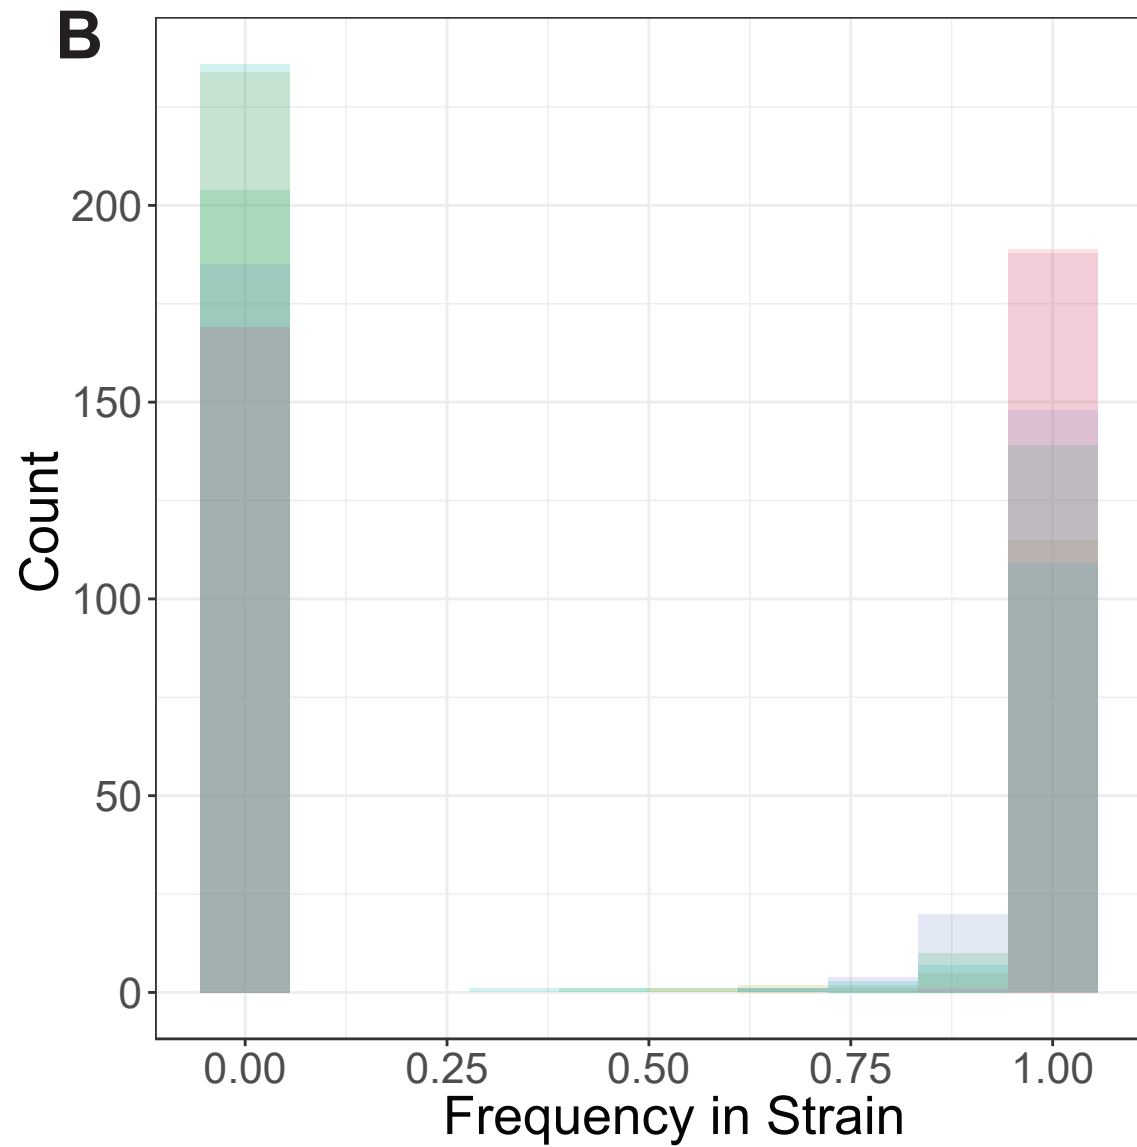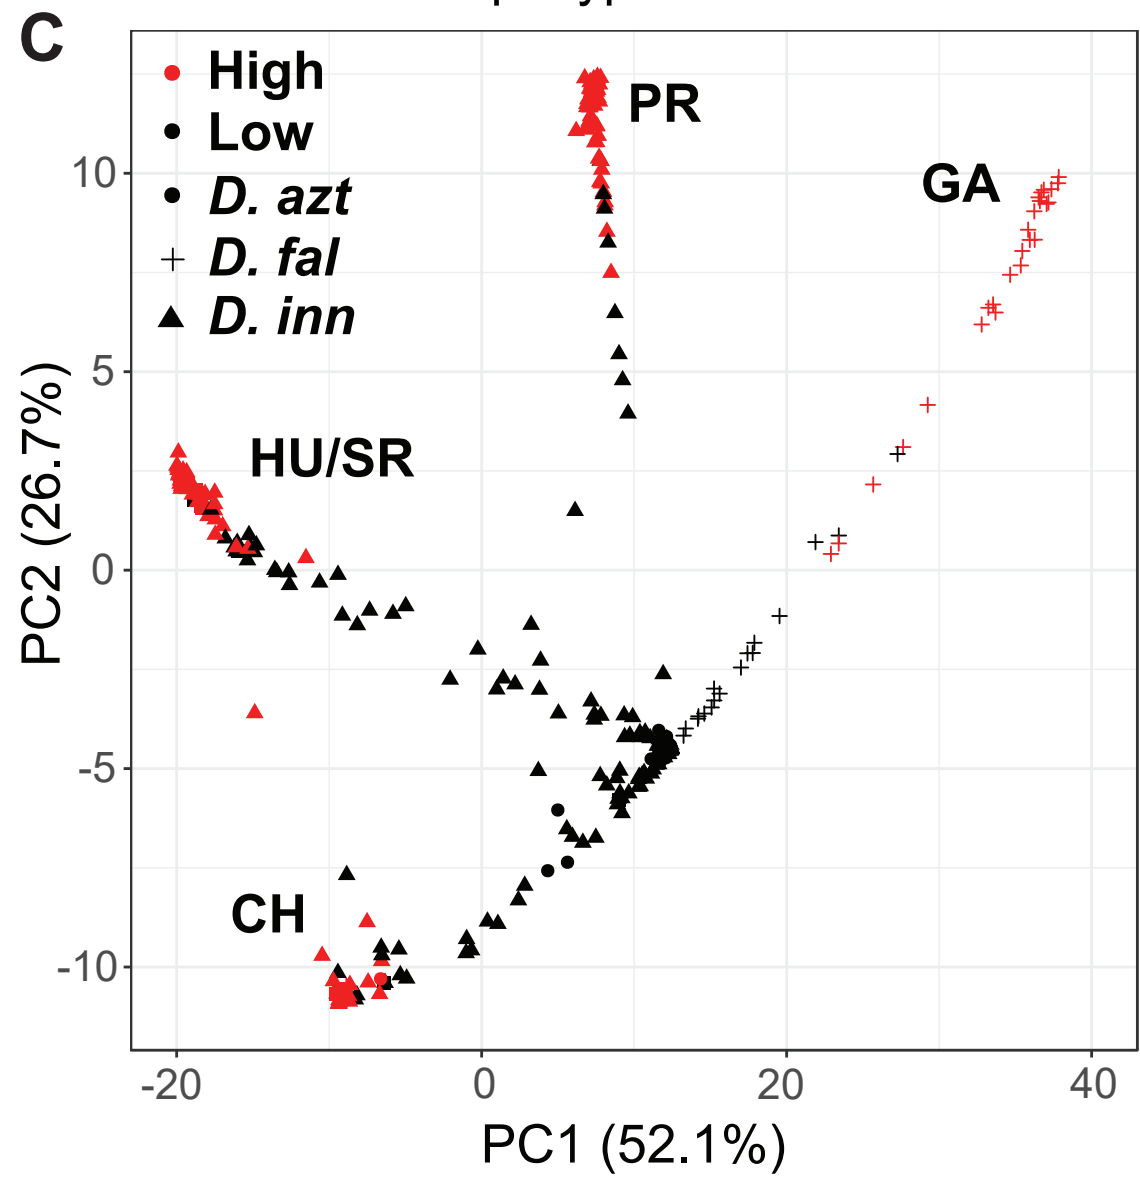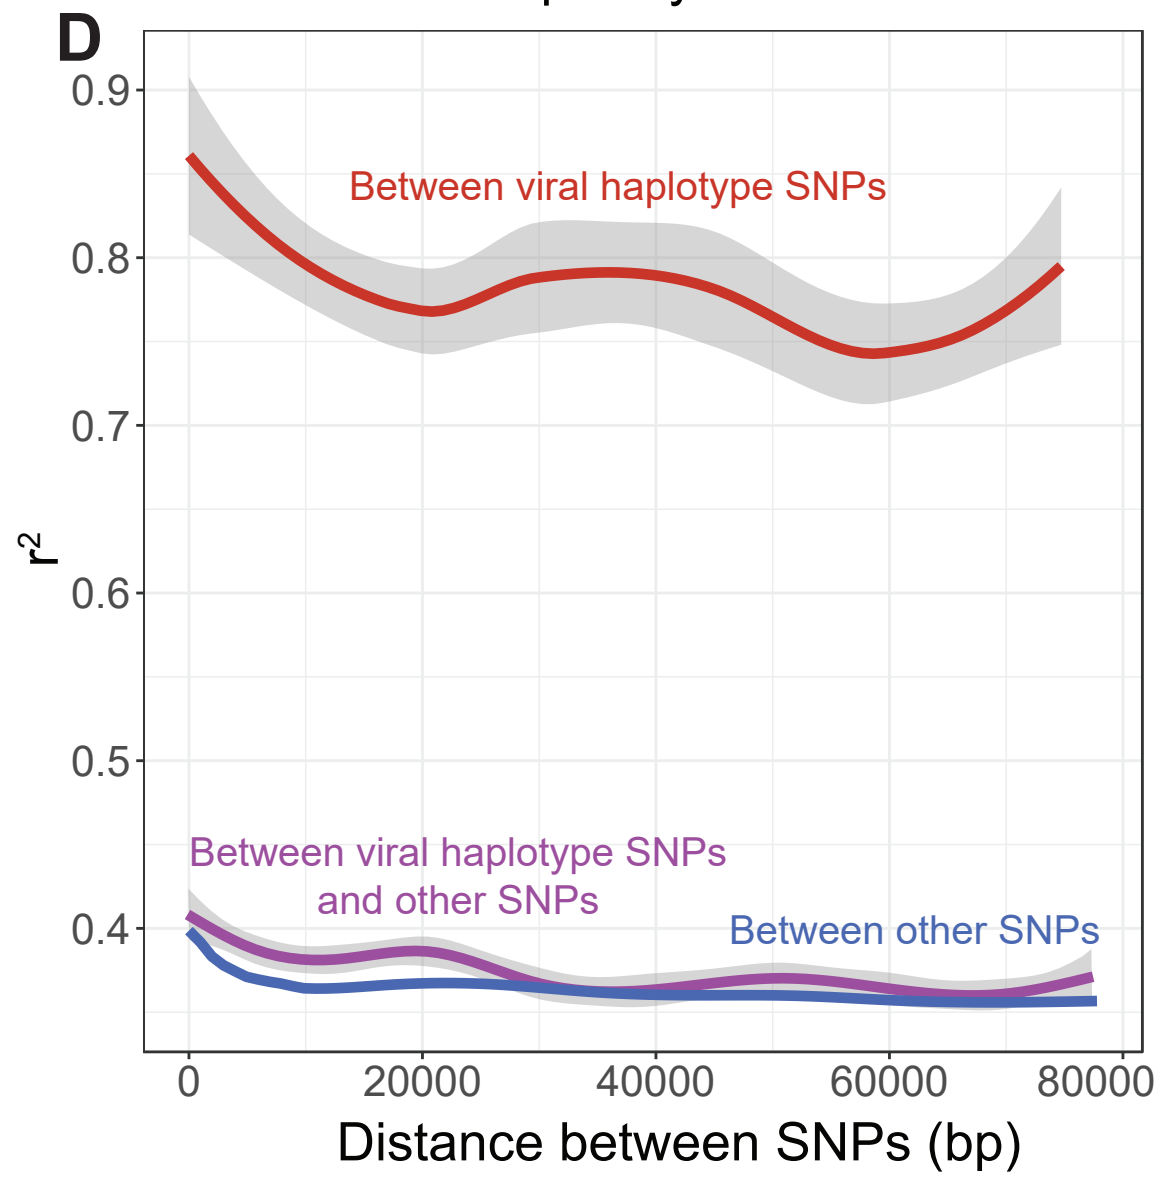

Supplement: supp [file elife_poa_e58931_Figure_5_figure_supplement_1.pdf › elife_poa_e58931_Figure_5_figure_supplement_1.pdf]

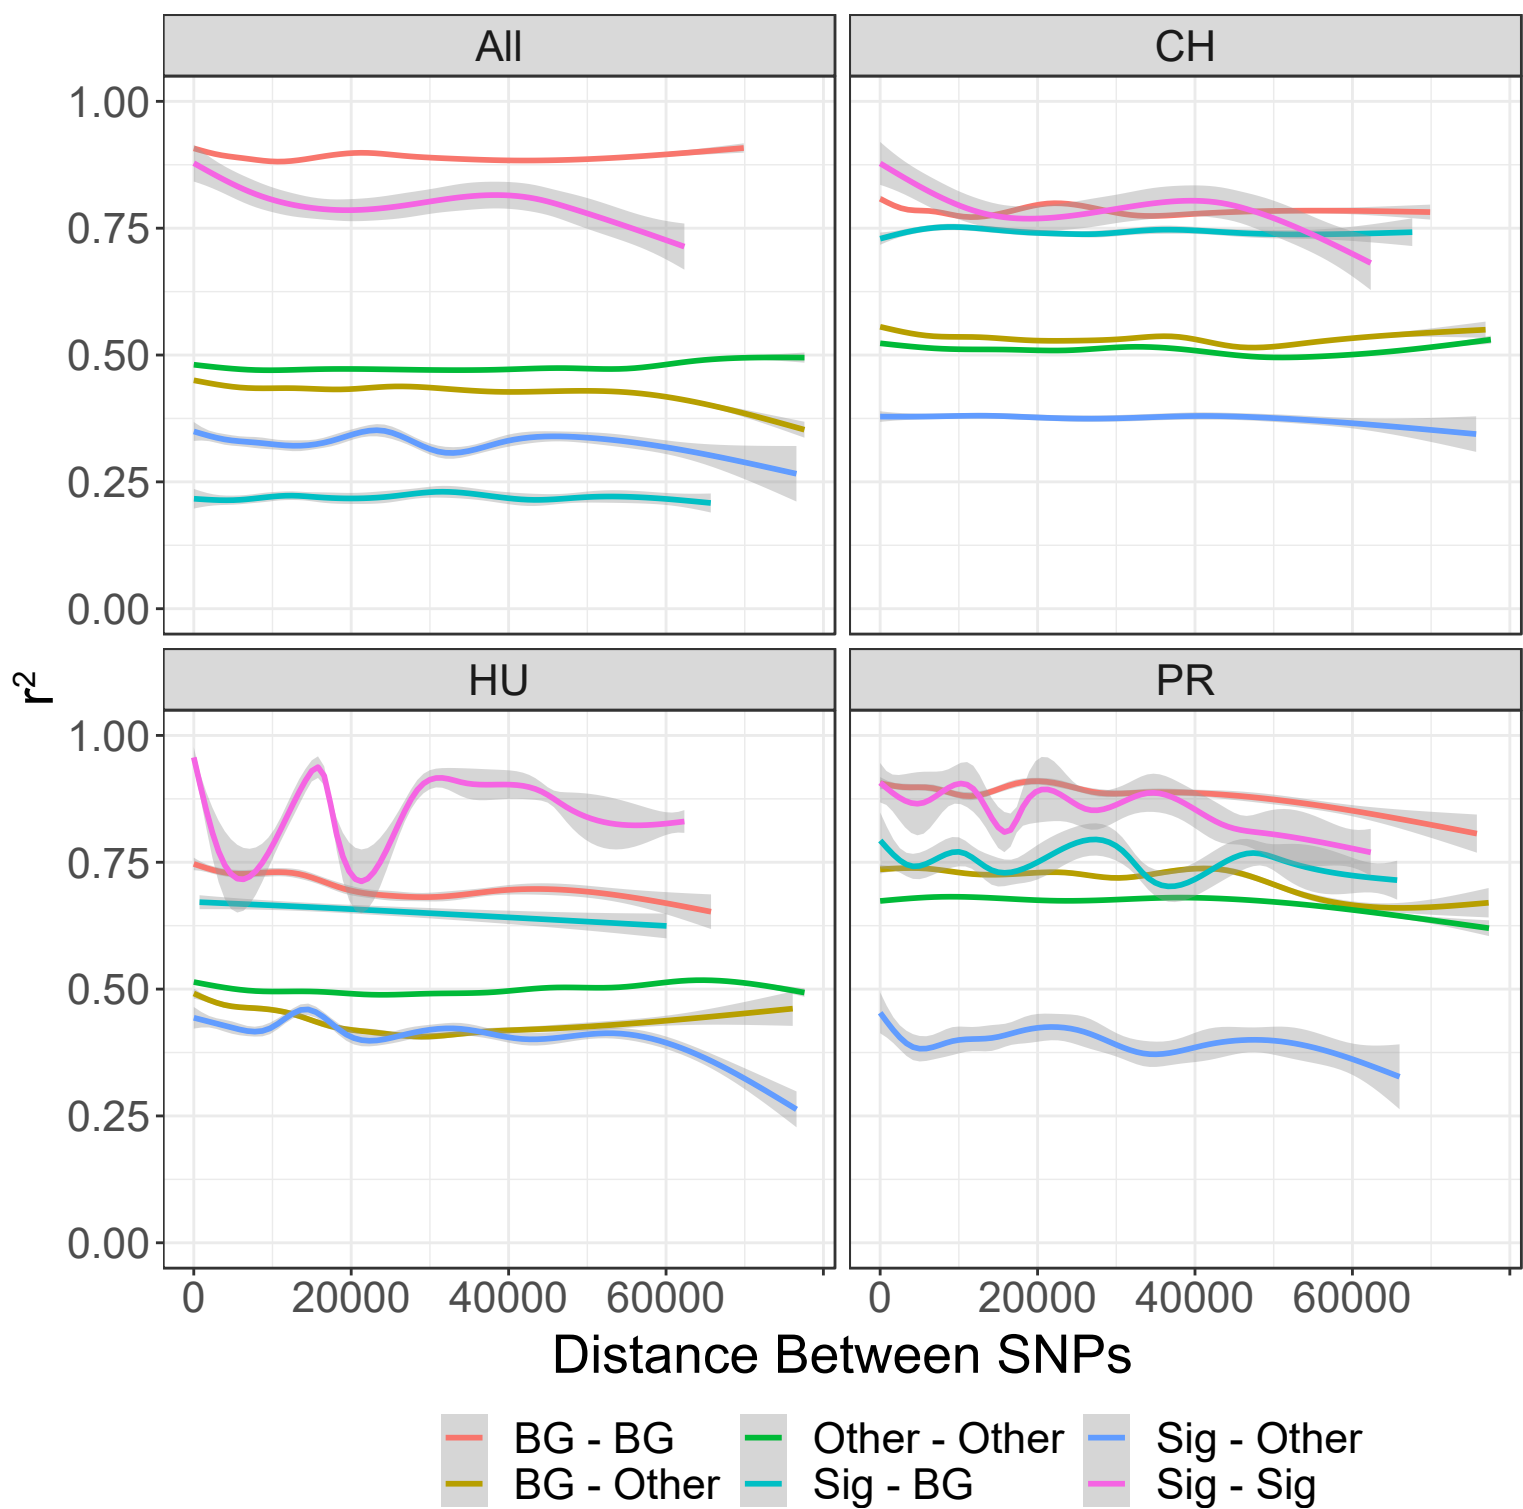

Supplement: supp [file elife_poa_e58931_Figure_5_figure_supplement_2.pdf › elife_poa_e58931_Figure_5_figure_supplement_2.pdf]

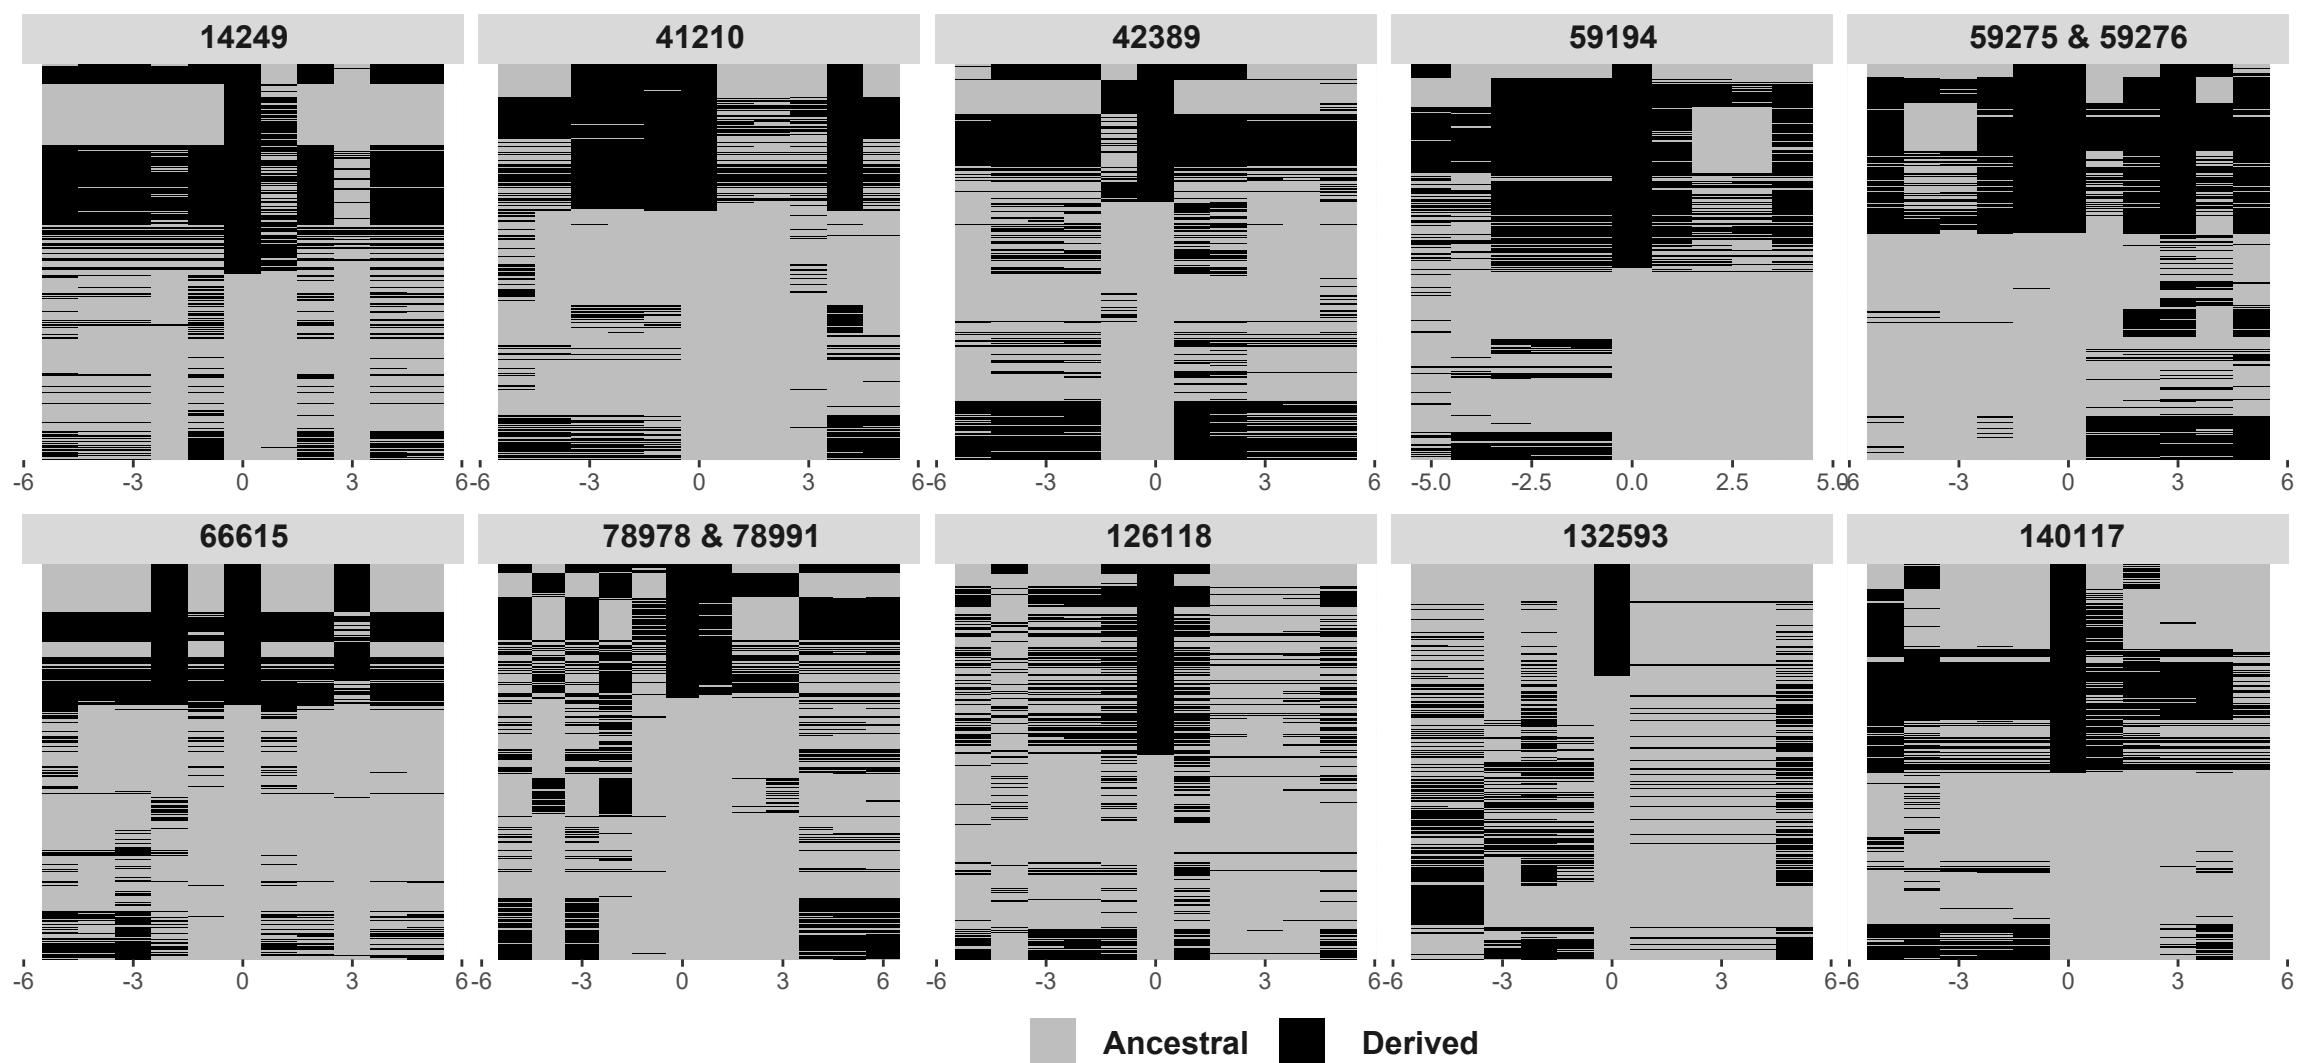

Supplement: supp [file elife_poa_e58931_Figure_5_figure_supplement_3.pdf › elife_poa_e58931_Figure_5_figure_supplement_3.pdf]

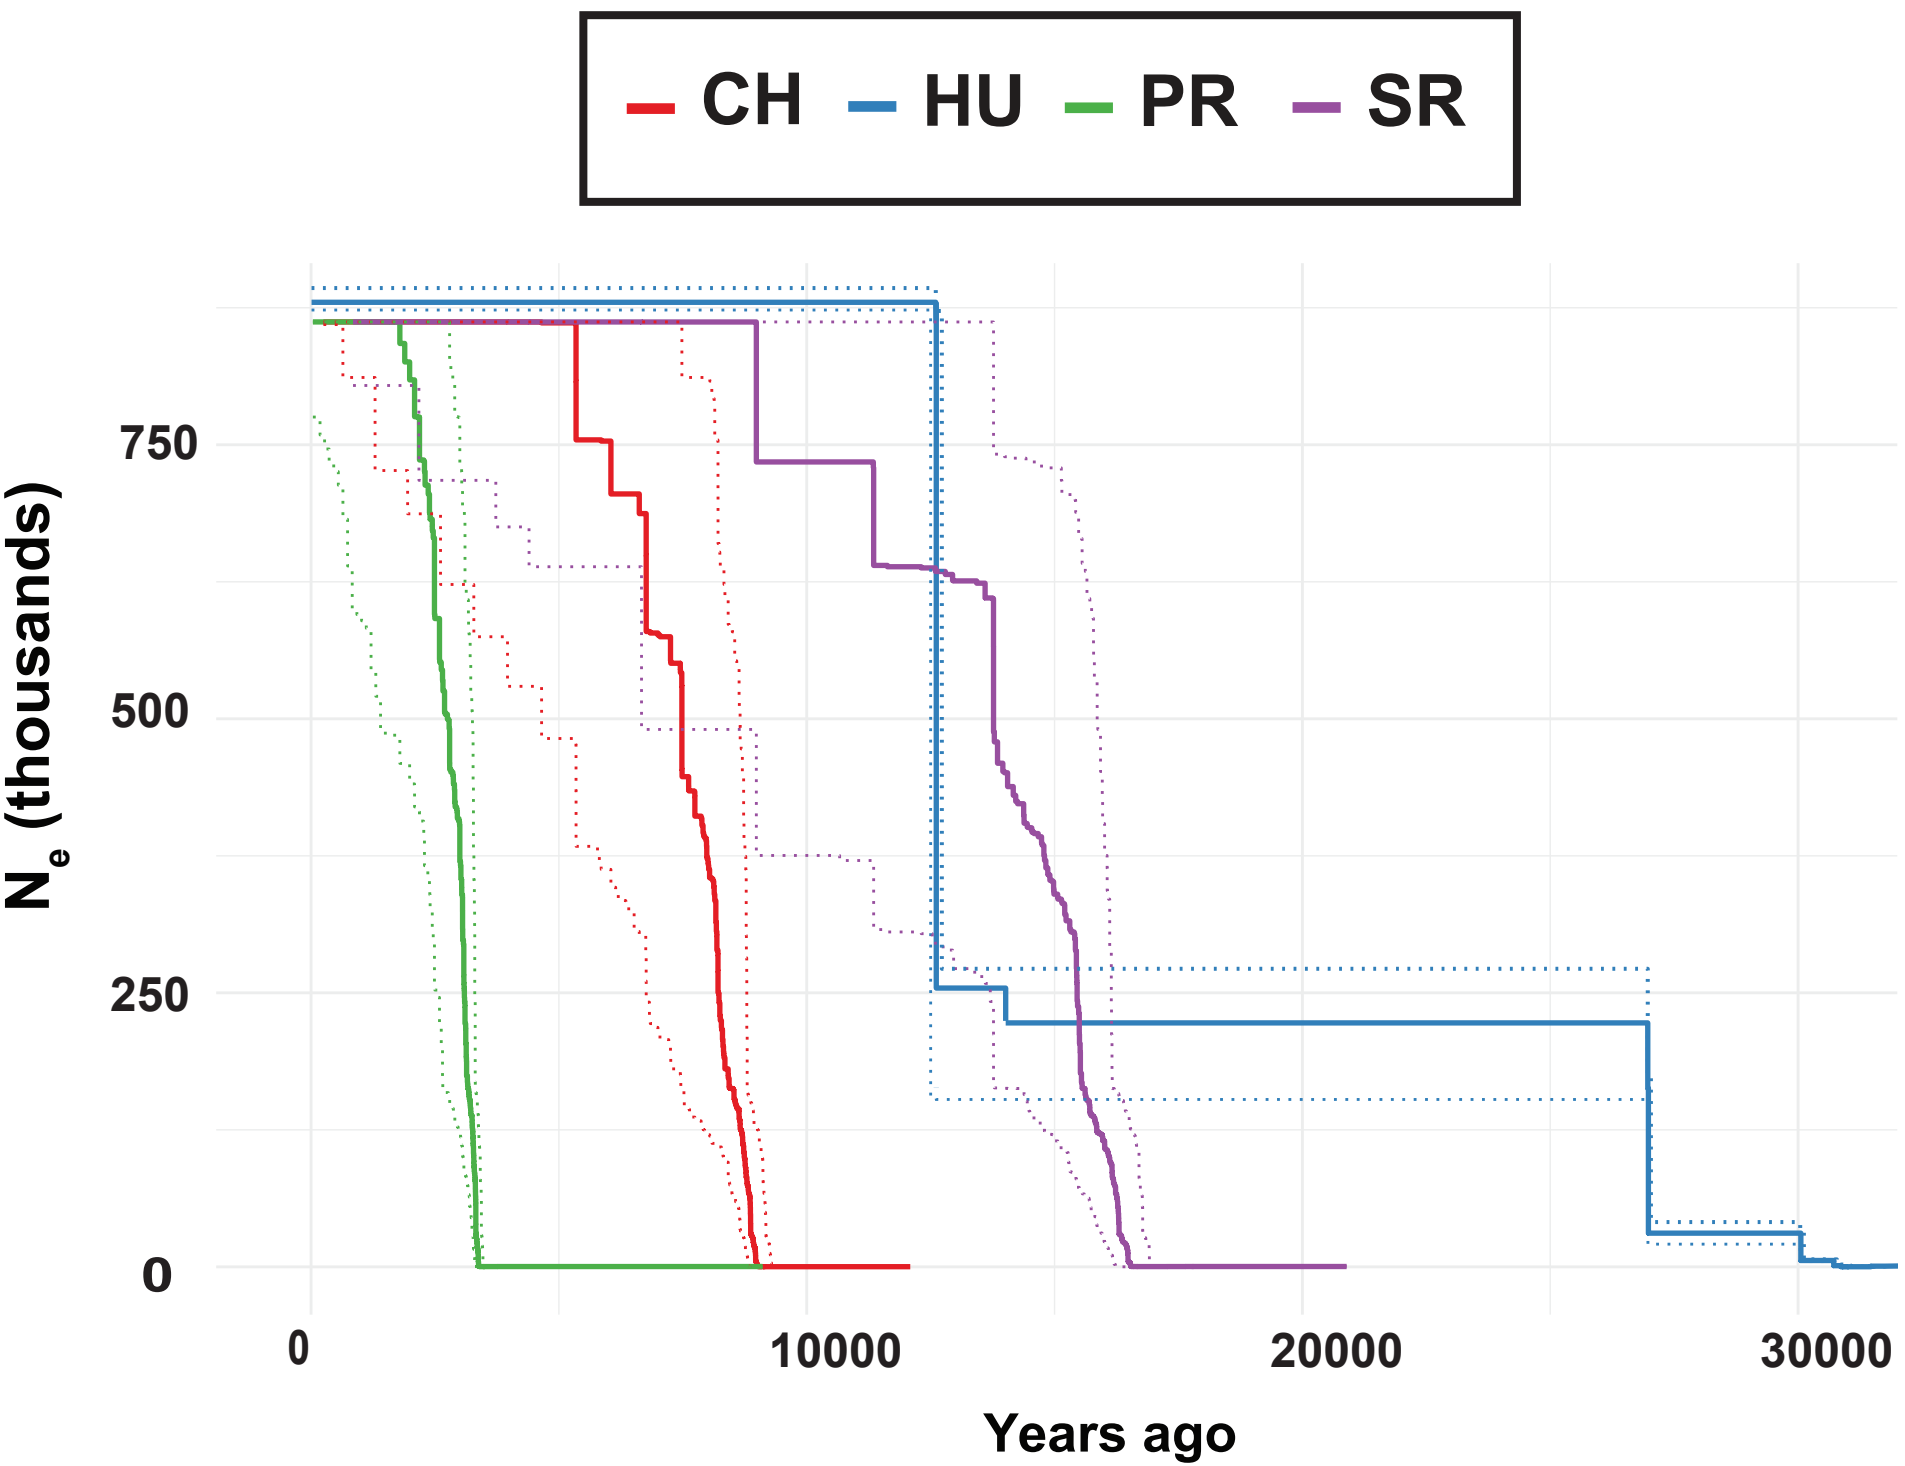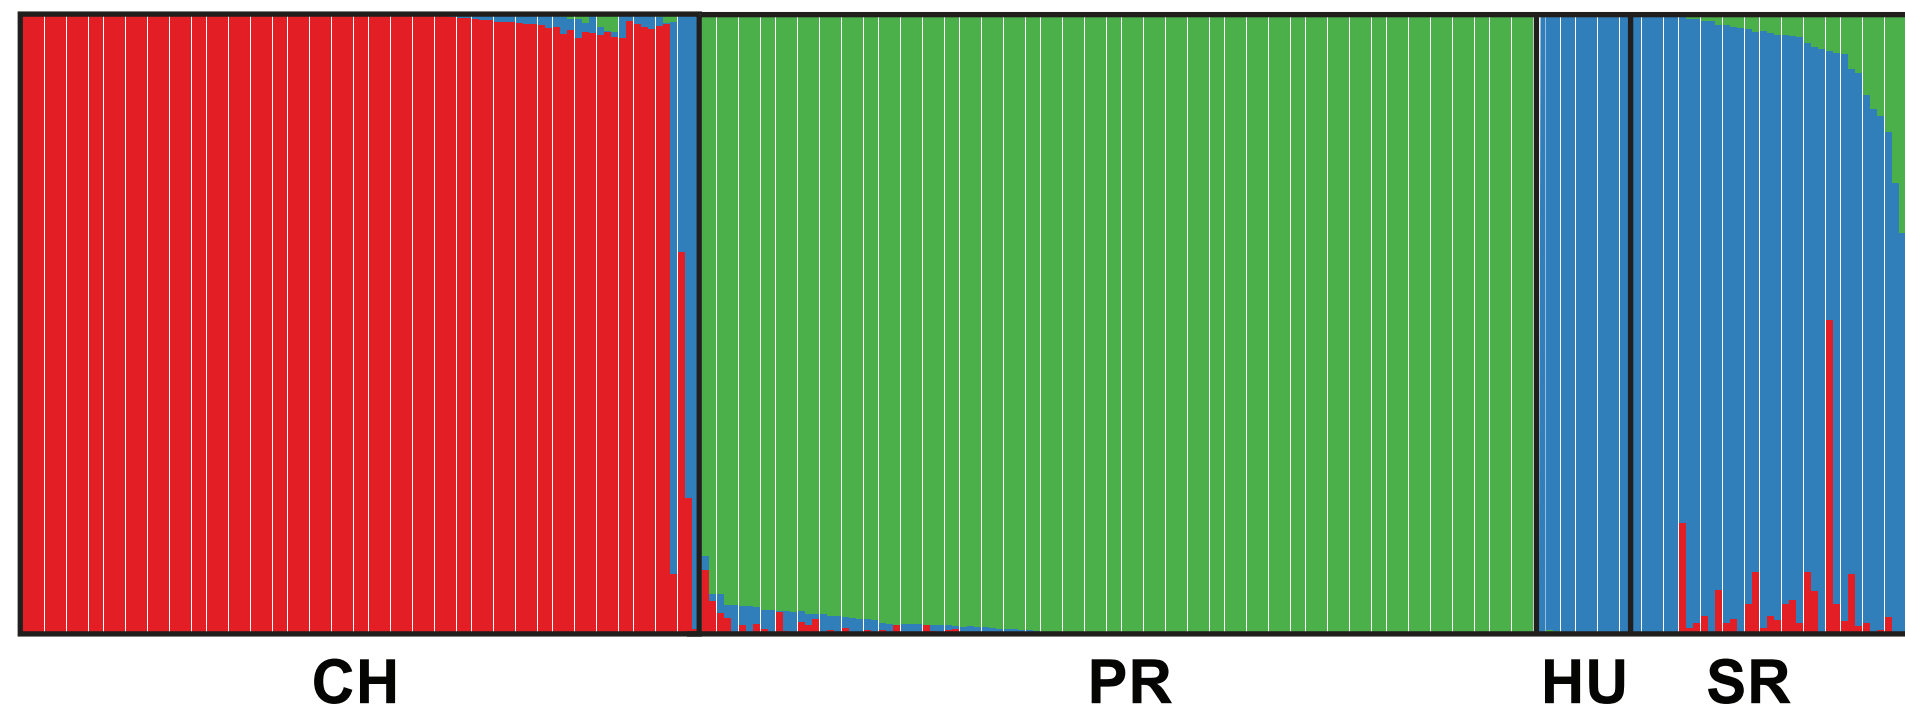

Supplement: supp [file elife_poa_e58931_Figure_5_figure_supplement_4.pdf › elife_poa_e58931_Figure_5_figure_supplement_4.pdf]
